# Supplementary material
Source: publisher figshare collection journal article supplement (https://acs.figshare.com/ndownloader/files/4620202)
Supplement: Supplementary file 1 [file 4620202]

# Manuscript ref.: cm-2008-00802g
# Title: Evaluation of Group 4 metal bis-cyclopentadienyl complexes with 
#        selenolate and tellurolate ligands for CVD of ME2 films (E = Se or Te)

#
# Authors: A.L. Hector, W. Levason, G. Reid, S.D. Reid and M. Webster
#
# Journal: Chemistry of Materials
# CCDC ref. no(s).: 670750-670754
# DOI:
#
##############################################################################
###    CIF submission form for molecular structure report                  ###
###    Version: 2.0.2  (6 July 1998). (Updated 20-Apr-2005)                ###
##############################################################################

# This is an electronic "form" for submitting structural details as a
# Crystallographic Information File (CIF). 
# Full details of the format of such files are given in the paper "The
# Crystallographic Information File (CIF): a New Standard Archive File for
# Crystallography" by S. R. Hall, F. H. Allen and I. D. Brown [Acta Cryst.
# (1991), A47, 655-685]. 
#
# The current version of the core CIF dictionary is obtainable from
# www.iucr.org as a pdf file. The current version number is 2.3.
#
# CIFs can be checked for legal syntax and possible errors (ALERTS) by
# using checkcif software.
# See the web (http://journals.iucr.org/services/cif/checkcif.html).
# The website  http://checkcif.iucr.org  produces o/p in pdf format.
#
#============================================================================== 
data_global
#==============================================================================

# SUBMISSION DETAILS
# ==================

_publ_contact_author_name           'Professor Gillian Reid'
_publ_contact_author_address   
;   School of Chemistry
    University of Southampton
    Southampton SO17 1BJ, UK
;
_publ_contact_author_email           gr@soton.ac.uk
_publ_contact_author_fax             '023 8059 3781'
_publ_contact_author_phone           '023 8059 3609'

_publ_contact_letter
; 
  December 2007
  Dear CCDC
  This file contains five crystal stucture determinations in CIF format.
  They are being offered as supporting information to accompany a paper
  to be submitted. Please supply the reference numbers.
  Thank you,  
  Gillian Reid
;
   
_publ_requested_journal              'Chemistry of Materials'
_publ_requested_category             ?  

 
#============================================================================
# TITLE AND AUTHOR LIST
# =====================

_publ_section_title
;
 Evaluation of Group 4 metal bis-cyclopentadienyl complexes with  selenolate and tellurolate ligands for CVD of ME2 films (E = Se or Te)
;
       
 
# The loop structure below should contain the names and addresses of all 
# authors, in the required order of publication. Repeat as necessary.
# Note order: Family_name, first name(s) or initials (or mixture).


loop_
	_publ_author_name
	_publ_author_address
 'Hector, Andrew L.'   
; School of Chemistry
  University of Southampton
  Southampton SO17 1BJ, UK
;
 'Levason, William'   
; School of Chemistry
  University of Southampton
  Southampton SO17 1BJ, UK
;
 'Reid, Gillian'   
; School of Chemistry
  University of Southampton
  Southampton SO17 1BJ, UK
;
 'Reid, Stuart D.'   
; School of Chemistry
  University of Southampton
  Southampton SO17 1BJ, UK
;

 'Webster, Michael'   
; School of Chemistry
  University of Southampton
  Southampton SO17 1BJ, UK
;

 
#============================================================================

# If more than one structure is reported, the remaining sections should be 
# completed per structure. For each data set, replace the '?' in the
# data_? line below by a unique (to this file) identifier.

#============================================================================
# 06sdr010a.cif  [Cp2Ti(SeMe)2] CCDC-670750

 
data_06sdr010 

_audit_creation_method          'SHELXL-97 + hand edit' 
_audit_creation_date            '2007-07-23'
_audit_author_name              'Webster, M.'
_audit_update_record            '2007-07-25 corrected name'

 
_chemical_name_systematic 
; 
 Bis(eta5-cyclopentadienyl)bis(methylselenolato)titanium(IV) 
; 
_chemical_name_common             ? 
_chemical_melting_point           ? 
_chemical_formula_moiety         'C12 H16 Se2 Ti' 
_chemical_formula_sum            'C12 H16 Se2 Ti' 
_chemical_formula_weight          366.07 
 
loop_ 
 _atom_type_symbol 
 _atom_type_description 
 _atom_type_scat_dispersion_real 
 _atom_type_scat_dispersion_imag 
 _atom_type_scat_source 
 'C'  'C'   0.0033   0.0016 
 'International Tables Vol C Tables 4.2.6.8 and 6.1.1.4' 
 'H'  'H'   0.0000   0.0000 
 'International Tables Vol C Tables 4.2.6.8 and 6.1.1.4' 
 'Ti'  'Ti'   0.2776   0.4457 
 'International Tables Vol C Tables 4.2.6.8 and 6.1.1.4' 
 'Se'  'Se'  -0.0929   2.2259 
 'International Tables Vol C Tables 4.2.6.8 and 6.1.1.4' 
 
_symmetry_cell_setting            tetragonal 
_symmetry_space_group_name_H-M    'P 41 21 2'
_symmetry_Int_Tables_number        92          #  Superceded **
_symmetry_space_group_name_Hall   'P 4abw 2nw' #  Superceded **


loop_ 
 _symmetry_equiv_pos_as_xyz 
 'x, y, z' 
 '-x, -y, z+1/2' 
 '-y+1/2, x+1/2, z+1/4' 
 'y+1/2, -x+1/2, z+3/4' 
 '-x+1/2, y+1/2, -z+1/4' 
 'x+1/2, -y+1/2, -z+3/4' 
 'y, x, -z' 
 '-y, -x, -z+1/2' 
 
_cell_length_a                    9.3965(15) 
_cell_length_b                    9.3965(15) 
_cell_length_c                    14.412(2) 
_cell_angle_alpha                 90.00 
_cell_angle_beta                  90.00 
_cell_angle_gamma                 90.00 
_cell_volume                      1272.5(3) 
_cell_formula_units_Z             4 
_cell_measurement_temperature     120(2) 
_cell_measurement_reflns_used     1526
_cell_measurement_theta_min       2.91
_cell_measurement_theta_max       27.48
 
_exptl_crystal_description        block 
_exptl_crystal_colour             green 
_exptl_crystal_size_max           0.18 
_exptl_crystal_size_mid           0.10 
_exptl_crystal_size_min           0.07 
_exptl_crystal_density_meas       ? 
_exptl_crystal_density_diffrn     1.911 
_exptl_crystal_density_method     'not measured' 
_exptl_crystal_F_000              712 
_exptl_absorpt_coefficient_mu     6.359 
_exptl_absorpt_correction_type    multi-scan
_exptl_absorpt_correction_T_min   0.7877 #  
_exptl_absorpt_correction_T_max   1.0000 #  
_exptl_absorpt_process_details 
   'G.M. Sheldrick, (2003). SADABS. Version 2.10. Bruker AXS Inc.'
  
 
_exptl_special_details 
; 
 ? 
; 
 
_diffrn_ambient_temperature       120(2) 
_diffrn_radiation_wavelength      0.71073 
_diffrn_radiation_type            MoK\a
_diffrn_radiation_source          'Bruker-Nonius FR591 rotating anode' 
_diffrn_radiation_monochromator   '10cm confocal mirrors'
_diffrn_measurement_device_type  
                        'Bruker-Nonius 95mm CCD camera on \k-goniostat' 
_diffrn_measurement_method        '\f & \w scans'
_diffrn_detector_area_resol_mean  ? 
_diffrn_standards_number          0 
_diffrn_standards_interval_count  ? 
_diffrn_standards_interval_time   ? 
_diffrn_standards_decay_%         0 
_diffrn_reflns_number             9731 
_diffrn_reflns_av_R_equivalents   0.0708 
_diffrn_reflns_av_sigmaI/netI     0.0497 
_diffrn_reflns_limit_h_min        -10 
_diffrn_reflns_limit_h_max        12 
_diffrn_reflns_limit_k_min        -12 
_diffrn_reflns_limit_k_max        11 
_diffrn_reflns_limit_l_min        -18 
_diffrn_reflns_limit_l_max        16 
_diffrn_reflns_theta_min          3.07 
_diffrn_reflns_theta_max          27.54 
_reflns_number_total              1473 
_reflns_number_gt                 1318 
_reflns_threshold_expression      I>2sigma(I) 
 
_computing_data_collection        ? 
_computing_cell_refinement        ? 
_computing_data_reduction         ? 
_computing_structure_solution     'SHELXS-97 (Sheldrick, 1997)' 
_computing_structure_refinement   'SHELXL-97 (Sheldrick, 1997)' 
_computing_molecular_graphics     ? 
_computing_publication_material   ? 
 
_refine_special_details 
; 
 Refinement of F^2^ against ALL reflections.  The weighted R-factor wR and 
 goodness of fit S are based on F^2^, conventional R-factors R are based 
 on F, with F set to zero for negative F^2^. The threshold expression of 
 F^2^ > 2sigma(F^2^) is used only for calculating R-factors(gt) etc. and is 
 not relevant to the choice of reflections for refinement.  R-factors based 
 on F^2^ are statistically about twice as large as those based on F, and R- 
 factors based on ALL data will be even larger. 
; 
 
_refine_ls_structure_factor_coef  Fsqd  
_refine_ls_matrix_type            full 
_refine_ls_weighting_scheme       calc  
_refine_ls_weighting_details 
 'w=1/[\s^2^(Fo^2^)+(0.0000P)^2^+4.5236P] where P=(Fo^2^+2Fc^2^)/3' 
_atom_sites_solution_primary      direct 
_atom_sites_solution_secondary    difmap 
_atom_sites_solution_hydrogens    geom 
_refine_ls_hydrogen_treatment     noref 
_refine_ls_extinction_method      none 
_refine_ls_extinction_coef        ? 
_refine_ls_abs_structure_details 
 'Flack H D (1983), Acta Cryst. A39, 876-881' 
_refine_ls_abs_structure_Flack    0.15(3)
_chemical_absolute_configuration  unk  
_refine_ls_number_reflns          1473 
_refine_ls_number_parameters      70 
_refine_ls_number_restraints      0 
_refine_ls_R_factor_all           0.0533 
_refine_ls_R_factor_gt            0.0423 
_refine_ls_wR_factor_ref          0.0790 
_refine_ls_wR_factor_gt           0.0747 
_refine_ls_goodness_of_fit_ref    1.144 
_refine_ls_restrained_S_all       1.144 
_refine_ls_shift/su_max           0.000 
_refine_ls_shift/su_mean          0.000 
 
loop_ 
 _atom_site_label 
 _atom_site_type_symbol 
 _atom_site_fract_x 
 _atom_site_fract_y 
 _atom_site_fract_z 
 _atom_site_U_iso_or_equiv 
 _atom_site_adp_type 
 _atom_site_occupancy 
 _atom_site_symmetry_multiplicity 
 _atom_site_calc_flag 
 _atom_site_refinement_flags 
 _atom_site_disorder_assembly 
 _atom_site_disorder_group 
Ti1 Ti 0.53667(10) 0.53667(10) 0.0000 0.0141(3) Uani 1 2 d S . . 
Se1 Se 0.48590(5) 0.32487(6) 0.10353(3) 0.01887(15) Uani 1 1 d . . . 
C1 C 0.3840(7) 0.7285(6) 0.0478(4) 0.0233(13) Uani 1 1 d . . . 
H1 H 0.2915 0.7554 0.0182 0.028 Uiso 1 1 calc R . . 
C2 C 0.5192(7) 0.7844(6) 0.0247(4) 0.0237(13) Uani 1 1 d . . . 
H2 H 0.5382 0.8598 -0.0226 0.028 Uiso 1 1 calc R . . 
C3 C 0.6194(6) 0.7311(6) 0.0900(4) 0.0239(13) Uani 1 1 d . . . 
H3 H 0.7208 0.7622 0.0957 0.029 Uiso 1 1 calc R . . 
C4 C 0.5486(6) 0.6421(6) 0.1509(3) 0.0197(11) Uani 1 1 d . . . 
H4 H 0.5909 0.5969 0.2073 0.024 Uiso 1 1 calc R . . 
C5 C 0.4010(6) 0.6376(6) 0.1252(4) 0.0222(13) Uani 1 1 d . . . 
H5 H 0.3229 0.5894 0.1603 0.027 Uiso 1 1 calc R . . 
C6  C 0.4842(7) 0.1551(6) 0.0246(4) 0.0292(14) Uani 1 1 d . . . 
H6A H 0.4648 0.0709 0.0627 0.044 Uiso 1 1 calc R . . 
H6B H 0.5770 0.1445 -0.0056 0.044 Uiso 1 1 calc R . . 
H6C H 0.4100 0.1649 -0.0227 0.044 Uiso 1 1 calc R . . 
 
loop_ 
 _atom_site_aniso_label 
 _atom_site_aniso_U_11 
 _atom_site_aniso_U_22 
 _atom_site_aniso_U_33 
 _atom_site_aniso_U_23 
 _atom_site_aniso_U_13 
 _atom_site_aniso_U_12 
Ti1 0.0147(4) 0.0147(4) 0.0127(5) 0.0004(4) -0.0004(4) 0.0005(5) 
Se1 0.0214(3) 0.0173(3) 0.0178(2) 0.0027(2) 0.0037(2) 0.0013(2) 
C1 0.029(3) 0.020(3) 0.021(3) -0.005(2) 0.001(2) 0.009(2) 
C2 0.037(3) 0.013(3) 0.022(3) -0.005(2) 0.002(3) -0.002(3) 
C3 0.026(3) 0.026(3) 0.019(3) -0.011(2) 0.000(2) -0.005(2) 
C4 0.023(3) 0.025(3) 0.011(2) -0.005(2) -0.002(2) 0.001(2) 
C5 0.025(3) 0.024(3) 0.018(3) -0.005(2) 0.003(2) 0.004(2) 
C6 0.033(3) 0.024(3) 0.031(3) -0.008(3) 0.008(3) 0.000(3) 
 
_geom_special_details 
; 
 All esds (except the esd in the dihedral angle between two l.s. planes) 
 are estimated using the full covariance matrix.  The cell esds are taken 
 into account individually in the estimation of esds in distances, angles 
 and torsion angles; correlations between esds in cell parameters are only 
 used when they are defined by crystal symmetry.  An approximate (isotropic) 
 treatment of cell esds is used for estimating esds involving l.s. planes. 
; 
 
loop_ 
 _geom_bond_atom_site_label_1 
 _geom_bond_atom_site_label_2 
 _geom_bond_distance 
 _geom_bond_site_symmetry_2 
 _geom_bond_publ_flag 
Ti1 C2 2.361(5) . ? 
Ti1 C2 2.361(5) 7 ? 
Ti1 C3 2.371(6) . ? 
Ti1 C3 2.371(6) 7 ? 
Ti1 C4 2.393(5) . ? 
Ti1 C4 2.393(5) 7 ? 
Ti1 C5 2.404(5) 7 ? 
Ti1 C5 2.404(5) . ? 
Ti1 C1 2.404(5) 7 ? 
Ti1 C1 2.404(5) . ? 
Ti1 Se1 2.5327(11) 7 ? 
Ti1 Se1 2.5327(11) . ? 
Se1 C6 1.960(6) . ? 
C1 C5 1.414(8) . ? 
C1 C2 1.415(9) . ? 
C1 H1 1.0000 . ? 
C2 C3 1.422(8) . ? 
C2 H2 1.0000 . ? 
C3 C4 1.384(8) . ? 
C3 H3 1.0000 . ? 
C4 C5 1.436(7) . ? 
C4 H4 1.0000 . ? 
C5 H5 1.0000 . ? 
C6 H6A 0.9800 . ? 
C6 H6B 0.9800 . ? 
C6 H6C 0.9800 . ? 
 
loop_ 
 _geom_angle_atom_site_label_1 
 _geom_angle_atom_site_label_2 
 _geom_angle_atom_site_label_3 
 _geom_angle 
 _geom_angle_site_symmetry_1 
 _geom_angle_site_symmetry_3 
 _geom_angle_publ_flag 
C2 Ti1 C2 99.2(3) . 7 ? 
C2 Ti1 C3 35.0(2) . . ? 
C2 Ti1 C3 79.2(2) 7 . ? 
C2 Ti1 C3 79.2(2) . 7 ? 
C2 Ti1 C3 35.0(2) 7 7 ? 
C3 Ti1 C3 78.1(3) . 7 ? 
C2 Ti1 C4 57.16(19) . . ? 
C2 Ti1 C4 96.89(19) 7 . ? 
C3 Ti1 C4 33.76(19) . . ? 
C3 Ti1 C4 109.0(2) 7 . ? 
C2 Ti1 C4 96.89(19) . 7 ? 
C2 Ti1 C4 57.16(19) 7 7 ? 
C3 Ti1 C4 109.0(2) . 7 ? 
C3 Ti1 C4 33.76(19) 7 7 ? 
C4 Ti1 C4 142.0(3) . 7 ? 
C2 Ti1 C5 131.6(2) . 7 ? 
C2 Ti1 C5 57.4(2) 7 7 ? 
C3 Ti1 C5 133.6(2) . 7 ? 
C3 Ti1 C5 57.3(2) 7 7 ? 
C4 Ti1 C5 152.05(19) . 7 ? 
C4 Ti1 C5 34.85(18) 7 7 ? 
C2 Ti1 C5 57.4(2) . . ? 
C2 Ti1 C5 131.6(2) 7 . ? 
C3 Ti1 C5 57.3(2) . . ? 
C3 Ti1 C5 133.6(2) 7 . ? 
C4 Ti1 C5 34.85(18) . . ? 
C4 Ti1 C5 152.05(19) 7 . ? 
C5 Ti1 C5 169.0(3) 7 . ? 
C2 Ti1 C1 133.1(2) . 7 ? 
C2 Ti1 C1 34.5(2) 7 7 ? 
C3 Ti1 C1 111.7(2) . 7 ? 
C3 Ti1 C1 57.4(2) 7 7 ? 
C4 Ti1 C1 118.19(19) . 7 ? 
C4 Ti1 C1 57.13(19) 7 7 ? 
C5 Ti1 C1 34.21(18) 7 7 ? 
C5 Ti1 C1 147.97(19) . 7 ? 
C2 Ti1 C1 34.5(2) . . ? 
C2 Ti1 C1 133.1(2) 7 . ? 
C3 Ti1 C1 57.4(2) . . ? 
C3 Ti1 C1 111.7(2) 7 . ? 
C4 Ti1 C1 57.13(19) . . ? 
C4 Ti1 C1 118.19(19) 7 . ? 
C5 Ti1 C1 147.97(19) 7 . ? 
C5 Ti1 C1 34.21(18) . . ? 
C1 Ti1 C1 167.6(3) 7 . ? 
C2 Ti1 Se1 102.72(15) . 7 ? 
C2 Ti1 Se1 132.29(14) 7 7 ? 
C3 Ti1 Se1 136.46(15) . 7 ? 
C3 Ti1 Se1 110.18(15) 7 7 ? 
C4 Ti1 Se1 130.56(13) . 7 ? 
C4 Ti1 Se1 78.38(13) 7 7 ? 
C5 Ti1 Se1 76.58(14) 7 7 ? 
C5 Ti1 Se1 95.71(14) . 7 ? 
C1 Ti1 Se1 107.94(14) 7 7 ? 
C1 Ti1 Se1 80.85(15) . 7 ? 
C2 Ti1 Se1 132.29(14) . . ? 
C2 Ti1 Se1 102.72(15) 7 . ? 
C3 Ti1 Se1 110.18(15) . . ? 
C3 Ti1 Se1 136.46(15) 7 . ? 
C4 Ti1 Se1 78.38(13) . . ? 
C4 Ti1 Se1 130.56(13) 7 . ? 
C5 Ti1 Se1 95.71(14) 7 . ? 
C5 Ti1 Se1 76.58(14) . . ? 
C1 Ti1 Se1 80.85(15) 7 . ? 
C1 Ti1 Se1 107.94(14) . . ? 
Se1 Ti1 Se1 92.93(5) 7 . ? 
C6 Se1 Ti1 107.41(18) . . ? 
C5 C1 C2 107.9(5) . . ? 
C5 C1 Ti1 72.9(3) . . ? 
C2 C1 Ti1 71.1(3) . . ? 
C5 C1 H1 125.9 . . ? 
C2 C1 H1 125.9 . . ? 
Ti1 C1 H1 125.9 . . ? 
C1 C2 C3 108.0(5) . . ? 
C1 C2 Ti1 74.4(3) . . ? 
C3 C2 Ti1 72.9(3) . . ? 
C1 C2 H2 125.7 . . ? 
C3 C2 H2 125.7 . . ? 
Ti1 C2 H2 125.7 . . ? 
C4 C3 C2 108.3(5) . . ? 
C4 C3 Ti1 74.0(3) . . ? 
C2 C3 Ti1 72.1(3) . . ? 
C4 C3 H3 125.6 . . ? 
C2 C3 H3 125.6 . . ? 
Ti1 C3 H3 125.6 . . ? 
C3 C4 C5 108.6(5) . . ? 
C3 C4 Ti1 72.3(3) . . ? 
C5 C4 Ti1 73.0(3) . . ? 
C3 C4 H4 125.6 . . ? 
C5 C4 H4 125.6 . . ? 
Ti1 C4 H4 125.6 . . ? 
C1 C5 C4 107.2(5) . . ? 
C1 C5 Ti1 72.9(3) . . ? 
C4 C5 Ti1 72.2(3) . . ? 
C1 C5 H5 126.2 . . ? 
C4 C5 H5 126.2 . . ? 
Ti1 C5 H5 126.2 . . ? 
Se1 C6 H6A 109.5 . . ? 
Se1 C6 H6B 109.5 . . ? 
H6A C6 H6B 109.5 . . ? 
Se1 C6 H6C 109.5 . . ? 
H6A C6 H6C 109.5 . . ? 
H6B C6 H6C 109.5 . . ? 
 
_diffrn_measured_fraction_theta_max    0.998 
_diffrn_reflns_theta_full              27.54 
_diffrn_measured_fraction_theta_full   0.998 
_refine_diff_density_max    0.525 
_refine_diff_density_min   -0.693 
_refine_diff_density_rms    0.127 
	 

#===END OF CIF ==============================================================
# 06sdr009b.cif  [Cp2Hf(SeMe)2]  CCDC-670751

 
data_06sdr009 

_audit_creation_method          'SHELXL-97 + hand edit' 
_audit_creation_date            '2007-07-23'
_audit_author_name              'Webster, M.' 
 
_chemical_name_systematic 
; 
 Bis(eta5-cyclopentadienyl)bis(methylselenolato)hafnium(IV) 
; 
_chemical_name_common             ? 
_chemical_melting_point           ? 
_chemical_formula_moiety         'C12 H16 Hf Se2' 
_chemical_formula_sum            'C12 H16 Hf Se2' 
_chemical_formula_weight          496.66 
 
loop_ 
 _atom_type_symbol 
 _atom_type_description 
 _atom_type_scat_dispersion_real 
 _atom_type_scat_dispersion_imag 
 _atom_type_scat_source 
 'C'  'C'   0.0033   0.0016 
 'International Tables Vol C Tables 4.2.6.8 and 6.1.1.4' 
 'H'  'H'   0.0000   0.0000 
 'International Tables Vol C Tables 4.2.6.8 and 6.1.1.4' 
 'Se'  'Se'  -0.0929   2.2259 
 'International Tables Vol C Tables 4.2.6.8 and 6.1.1.4' 
 'Hf'  'Hf'  -0.5830   6.1852 
 'International Tables Vol C Tables 4.2.6.8 and 6.1.1.4' 

_symmetry_cell_setting             tetragonal
_symmetry_space_group_name_H-M    'P 41 21 2'
_symmetry_Int_Tables_number        92           #  Superceded **
_symmetry_space_group_name_Hall   'P 4abw 2nw'  #  Superceded **
  
 
loop_ 
 _symmetry_equiv_pos_as_xyz 
 'x, y, z' 
 '-x, -y, z+1/2' 
 '-y+1/2, x+1/2, z+1/4' 
 'y+1/2, -x+1/2, z+3/4' 
 '-x+1/2, y+1/2, -z+1/4' 
 'x+1/2, -y+1/2, -z+3/4' 
 'y, x, -z' 
 '-y, -x, -z+1/2' 
 
_cell_length_a                    9.5191(10) 
_cell_length_b                    9.5191(10) 
_cell_length_c                    14.604(2) 
_cell_angle_alpha                 90.00 
_cell_angle_beta                  90.00 
_cell_angle_gamma                 90.00 
_cell_volume                      1323.3(3) 
_cell_formula_units_Z             4 
_cell_measurement_temperature     120(2) 
_cell_measurement_reflns_used     1582 
_cell_measurement_theta_min       2.91
_cell_measurement_theta_max       27.48
 
_exptl_crystal_description        block 
_exptl_crystal_colour            'pale yellow' 
_exptl_crystal_size_max           0.20 
_exptl_crystal_size_mid           0.10 
_exptl_crystal_size_min           0.10 
_exptl_crystal_density_meas       ? 
_exptl_crystal_density_diffrn     2.493 
_exptl_crystal_density_method     'not measured' 
_exptl_crystal_F_000              912 
_exptl_absorpt_coefficient_mu     13.351
_exptl_absorpt_correction_type    multi-scan 
_exptl_absorpt_correction_T_min   0.7113 # 0.1754 
_exptl_absorpt_correction_T_max   1.0000 # 0.3486 
_exptl_absorpt_process_details    
   'G.M. Sheldrick, (2003). SADABS. Version 2.10. Bruker AXS Inc.'
 
_exptl_special_details 
; 
 ? 
; 
 
_diffrn_ambient_temperature       120(2) 
_diffrn_radiation_wavelength      0.71073 
_diffrn_radiation_type            MoK\a 
_diffrn_radiation_source          'Bruker-Nonius FR591 rotating anode' 
_diffrn_radiation_monochromator   '10cm confocal mirrors'
_diffrn_measurement_device_type  
                       'Bruker-Nonius 95mm CCD camera on \k-goniostat' 
_diffrn_measurement_method        '\f & \w scans'
_diffrn_detector_area_resol_mean  ? 
_diffrn_standards_number          0 
_diffrn_standards_interval_count  ? 
_diffrn_standards_interval_time   ? 
_diffrn_standards_decay_%         0 
_diffrn_reflns_number             9940 
_diffrn_reflns_av_R_equivalents   0.0514 
_diffrn_reflns_av_sigmaI/netI     0.0338 
_diffrn_reflns_limit_h_min        -11 
_diffrn_reflns_limit_h_max        12 
_diffrn_reflns_limit_k_min        -11 
_diffrn_reflns_limit_k_max        12 
_diffrn_reflns_limit_l_min        -18 
_diffrn_reflns_limit_l_max        18 
_diffrn_reflns_theta_min          3.33 
_diffrn_reflns_theta_max          27.48 
_reflns_number_total              1525 
_reflns_number_gt                 1496 
_reflns_threshold_expression      I>2sigma(I) 
 
_computing_data_collection        ? 
_computing_cell_refinement        ? 
_computing_data_reduction         ? 
_computing_structure_solution     'SHELXS-97 (Sheldrick, 1997)' 
_computing_structure_refinement   'SHELXL-97 (Sheldrick, 1997)' 
_computing_molecular_graphics     ? 
_computing_publication_material   ? 
 
_refine_special_details 
; 
 Refinement of F^2^ against ALL reflections.  The weighted R-factor wR and 
 goodness of fit S are based on F^2^, conventional R-factors R are based 
 on F, with F set to zero for negative F^2^. The threshold expression of 
 F^2^ > 2sigma(F^2^) is used only for calculating R-factors(gt) etc. and is 
 not relevant to the choice of reflections for refinement.  R-factors based 
 on F^2^ are statistically about twice as large as those based on F, and R- 
 factors based on ALL data will be even larger. 
; 
 
_refine_ls_structure_factor_coef  Fsqd  
_refine_ls_matrix_type            full 
_refine_ls_weighting_scheme       calc  
_refine_ls_weighting_details 
 'w=1/[\s^2^(Fo^2^)+(0.0000P)^2^+2.8167P] where P=(Fo^2^+2Fc^2^)/3' 
_atom_sites_solution_primary      direct 
_atom_sites_solution_secondary    difmap 
_atom_sites_solution_hydrogens    geom 
_refine_ls_hydrogen_treatment     noref 
_refine_ls_extinction_method      none 
_refine_ls_extinction_coef        ? 
_refine_ls_abs_structure_details 
 'Flack H D (1983), Acta Cryst. A39, 876-881' 
_refine_ls_abs_structure_Flack    0.08(2) 
_chemical_absolute_configuration  ad
_refine_ls_number_reflns          1525 
_refine_ls_number_parameters      69 
_refine_ls_number_restraints      0 
_refine_ls_R_factor_all           0.0212 
_refine_ls_R_factor_gt            0.0204 
_refine_ls_wR_factor_ref          0.0450 
_refine_ls_wR_factor_gt           0.0443 
_refine_ls_goodness_of_fit_ref    1.115 
_refine_ls_restrained_S_all       1.115 
_refine_ls_shift/su_max           0.000 
_refine_ls_shift/su_mean          0.000 
 
loop_ 
 _atom_site_label 
 _atom_site_type_symbol 
 _atom_site_fract_x 
 _atom_site_fract_y 
 _atom_site_fract_z 
 _atom_site_U_iso_or_equiv 
 _atom_site_adp_type 
 _atom_site_occupancy 
 _atom_site_symmetry_multiplicity 
 _atom_site_calc_flag 
 _atom_site_refinement_flags 
 _atom_site_disorder_assembly 
 _atom_site_disorder_group 
Hf1 Hf 0.534157(16) 0.534157(16) 0.0000 0.01341(8) Uani 1 2 d S . . 
Se1 Se 0.48790(5) 0.32142(4) 0.10879(3) 0.02005(11) Uani 1 1 d . . . 
C1 C 0.6162(5) 0.7355(5) 0.0932(3) 0.0271(11) Uani 1 1 d . . . 
H1 H 0.7159 0.7666 0.1000 0.033 Uiso 1 1 calc R . . 
C2 C 0.5439(5) 0.6488(5) 0.1532(3) 0.0208(9) Uani 1 1 d . . . 
H2 H 0.5836 0.6059 0.2101 0.025 Uiso 1 1 calc R . . 
C3 C 0.4007(5) 0.6482(5) 0.1279(3) 0.0184(9) Uani 1 1 d . . . 
H3 H 0.3224 0.6044 0.1635 0.022 Uiso 1 1 calc R . . 
C4 C 0.3854(5) 0.7351(5) 0.0523(3) 0.0234(10) Uani 1 1 d . . . 
H4 H 0.2941 0.7648 0.0244 0.028 Uiso 1 1 calc R . . 
C5 C 0.5190(6) 0.7882(5) 0.0288(3) 0.0268(11) Uani 1 1 d . . . 
H5 H 0.5381 0.8638 -0.0170 0.032 Uiso 1 1 calc R . . 
C6  C 0.4910(6) 0.1549(5) 0.0296(4) 0.0319(12) Uani 1 1 d . . . 
H6A H 0.4741 0.0707 0.0665 0.048 Uiso 1 1 calc R . . 
H6B H 0.5829 0.1476 -0.0003 0.048 Uiso 1 1 calc R . . 
H6C H 0.4175 0.1633 -0.0171 0.048 Uiso 1 1 calc R . . 
 
loop_ 
 _atom_site_aniso_label 
 _atom_site_aniso_U_11 
 _atom_site_aniso_U_22 
 _atom_site_aniso_U_33 
 _atom_site_aniso_U_23 
 _atom_site_aniso_U_13 
 _atom_site_aniso_U_12 
Hf1 0.01435(9) 0.01435(9) 0.01155(13) -0.00015(7) 0.00015(7) 0.00030(9) 
Se1 0.0241(2) 0.0182(2) 0.0179(2) 0.00321(17) 0.00516(19) 0.00156(18) 
C1 0.028(3) 0.026(3) 0.027(3) -0.014(2) 0.000(2) -0.008(2) 
C2 0.026(2) 0.026(2) 0.010(2) -0.0053(18) -0.0034(19) 0.001(2) 
C3 0.021(2) 0.024(2) 0.010(2) -0.0054(17) 0.0012(16) 0.0024(18) 
C4 0.030(3) 0.022(2) 0.018(2) -0.008(2) -0.002(2) 0.009(2) 
C5 0.043(3) 0.016(2) 0.022(2) -0.0063(17) -0.001(2) -0.001(2) 
C6 0.038(3) 0.022(2) 0.036(3) -0.005(2) 0.008(2) -0.003(2) 
 
_geom_special_details 
; 
 All esds (except the esd in the dihedral angle between two l.s. planes) 
 are estimated using the full covariance matrix.  The cell esds are taken 
 into account individually in the estimation of esds in distances, angles 
 and torsion angles; correlations between esds in cell parameters are only 
 used when they are defined by crystal symmetry.  An approximate (isotropic) 
 treatment of cell esds is used for estimating esds involving l.s. planes. 
; 
 
loop_ 
 _geom_bond_atom_site_label_1 
 _geom_bond_atom_site_label_2 
 _geom_bond_distance 
 _geom_bond_site_symmetry_2 
 _geom_bond_publ_flag 
Hf1 C5 2.458(4) 7 ? 
Hf1 C5 2.458(4) . ? 
Hf1 C1 2.476(5) . ? 
Hf1 C1 2.476(5) 7 ? 
Hf1 C2 2.492(4) . ? 
Hf1 C2 2.492(4) 7 ? 
Hf1 C4 2.500(5) 7 ? 
Hf1 C4 2.500(5) . ? 
Hf1 C3 2.506(4) 7 ? 
Hf1 C3 2.506(4) . ? 
Hf1 Se1 2.6113(5) 7 ? 
Hf1 Se1 2.6113(5) . ? 
Se1 C6 1.963(5) . ? 
C1 C2 1.387(7) . ? 
C1 C5 1.410(7) . ? 
C1 H1 1.0000 . ? 
C2 C3 1.412(6) . ? 
C2 H2 1.0000 . ? 
C3 C4 1.388(6) . ? 
C3 H3 1.0000 . ? 
C4 C5 1.411(7) . ? 
C4 H4 1.0000 . ? 
C5 H5 1.0000 . ? 
C6 H6A 0.9800 . ? 
C6 H6B 0.9800 . ? 
C6 H6C 0.9800 . ? 
 
loop_ 
 _geom_angle_atom_site_label_1 
 _geom_angle_atom_site_label_2 
 _geom_angle_atom_site_label_3 
 _geom_angle 
 _geom_angle_site_symmetry_1 
 _geom_angle_site_symmetry_3 
 _geom_angle_publ_flag 
C5 Hf1 C5 98.3(3) 7 . ? 
C5 Hf1 C1 80.17(18) 7 . ? 
C5 Hf1 C1 33.21(18) . . ? 
C5 Hf1 C1 33.21(18) 7 7 ? 
C5 Hf1 C1 80.17(18) . 7 ? 
C1 Hf1 C1 79.3(2) . 7 ? 
C5 Hf1 C2 98.20(16) 7 . ? 
C5 Hf1 C2 54.38(15) . . ? 
C1 Hf1 C2 32.42(16) . . ? 
C1 Hf1 C2 109.06(16) 7 . ? 
C5 Hf1 C2 54.38(15) 7 7 ? 
C5 Hf1 C2 98.20(16) . 7 ? 
C1 Hf1 C2 109.06(16) . 7 ? 
C1 Hf1 C2 32.42(15) 7 7 ? 
C2 Hf1 C2 140.7(2) . 7 ? 
C5 Hf1 C4 33.05(17) 7 7 ? 
C5 Hf1 C4 130.86(19) . 7 ? 
C1 Hf1 C4 111.40(17) . 7 ? 
C1 Hf1 C4 54.45(17) 7 7 ? 
C2 Hf1 C4 119.61(16) . 7 ? 
C2 Hf1 C4 53.95(15) 7 7 ? 
C5 Hf1 C4 130.86(19) 7 . ? 
C5 Hf1 C4 33.05(17) . . ? 
C1 Hf1 C4 54.45(17) . . ? 
C1 Hf1 C4 111.40(17) 7 . ? 
C2 Hf1 C4 53.95(15) . . ? 
C2 Hf1 C4 119.61(16) 7 . ? 
C4 Hf1 C4 163.8(2) 7 . ? 
C5 Hf1 C3 54.33(16) 7 7 ? 
C5 Hf1 C3 130.64(15) . 7 ? 
C1 Hf1 C3 131.69(16) . 7 ? 
C1 Hf1 C3 54.21(16) 7 7 ? 
C2 Hf1 C3 151.09(15) . 7 ? 
C2 Hf1 C3 32.83(14) 7 7 ? 
C4 Hf1 C3 32.19(15) 7 7 ? 
C4 Hf1 C3 149.42(14) . 7 ? 
C5 Hf1 C3 130.64(15) 7 . ? 
C5 Hf1 C3 54.33(16) . . ? 
C1 Hf1 C3 54.21(16) . . ? 
C1 Hf1 C3 131.69(16) 7 . ? 
C2 Hf1 C3 32.83(14) . . ? 
C2 Hf1 C3 151.09(15) 7 . ? 
C4 Hf1 C3 149.42(14) 7 . ? 
C4 Hf1 C3 32.19(15) . . ? 
C3 Hf1 C3 174.0(2) 7 . ? 
C5 Hf1 Se1 130.45(11) 7 7 ? 
C5 Hf1 Se1 102.98(13) . 7 ? 
C1 Hf1 Se1 135.17(13) . 7 ? 
C1 Hf1 Se1 108.60(12) 7 7 ? 
C2 Hf1 Se1 130.48(11) . 7 ? 
C2 Hf1 Se1 78.44(11) 7 7 ? 
C4 Hf1 Se1 108.19(11) 7 7 ? 
C4 Hf1 Se1 82.85(11) . 7 ? 
C3 Hf1 Se1 78.29(10) 7 7 ? 
C3 Hf1 Se1 97.67(10) . 7 ? 
C5 Hf1 Se1 102.98(13) 7 . ? 
C5 Hf1 Se1 130.45(11) . . ? 
C1 Hf1 Se1 108.60(12) . . ? 
C1 Hf1 Se1 135.17(13) 7 . ? 
C2 Hf1 Se1 78.44(11) . . ? 
C2 Hf1 Se1 130.48(11) 7 . ? 
C4 Hf1 Se1 82.85(11) 7 . ? 
C4 Hf1 Se1 108.19(11) . . ? 
C3 Hf1 Se1 97.67(10) 7 . ? 
C3 Hf1 Se1 78.29(10) . . ? 
Se1 Hf1 Se1 96.24(2) 7 . ? 
C6 Se1 Hf1 105.37(15) . . ? 
C2 C1 C5 107.9(4) . . ? 
C2 C1 Hf1 74.4(3) . . ? 
C5 C1 Hf1 72.7(3) . . ? 
C2 C1 H1 125.7 . . ? 
C5 C1 H1 125.7 . . ? 
Hf1 C1 H1 125.7 . . ? 
C1 C2 C3 108.4(4) . . ? 
C1 C2 Hf1 73.2(3) . . ? 
C3 C2 Hf1 74.2(2) . . ? 
C1 C2 H2 125.5 . . ? 
C3 C2 H2 125.5 . . ? 
Hf1 C2 H2 125.5 . . ? 
C4 C3 C2 107.9(4) . . ? 
C4 C3 Hf1 73.6(2) . . ? 
C2 C3 Hf1 73.0(2) . . ? 
C4 C3 H3 125.8 . . ? 
C2 C3 H3 125.8 . . ? 
Hf1 C3 H3 125.8 . . ? 
C3 C4 C5 108.2(4) . . ? 
C3 C4 Hf1 74.2(3) . . ? 
C5 C4 Hf1 71.9(3) . . ? 
C3 C4 H4 125.7 . . ? 
C5 C4 H4 125.7 . . ? 
Hf1 C4 H4 125.7 . . ? 
C1 C5 C4 107.6(4) . . ? 
C1 C5 Hf1 74.1(3) . . ? 
C4 C5 Hf1 75.1(3) . . ? 
C1 C5 H5 125.7 . . ? 
C4 C5 H5 125.7 . . ? 
Hf1 C5 H5 125.7 . . ? 
Se1 C6 H6A 109.5 . . ? 
Se1 C6 H6B 109.5 . . ? 
H6A C6 H6B 109.5 . . ? 
Se1 C6 H6C 109.5 . . ? 
H6A C6 H6C 109.5 . . ? 
H6B C6 H6C 109.5 . . ? 
 
_diffrn_measured_fraction_theta_max    0.998 
_diffrn_reflns_theta_full              27.48 
_diffrn_measured_fraction_theta_full   0.998 
_refine_diff_density_max    0.684 
_refine_diff_density_min   -1.119 
_refine_diff_density_rms    0.161 


#===END OF CIF ==============================================================
# 06sdr006a.cif  [{(Cp)2Zr(SeMe)}2O]  CCDC-670752

 
data_06sdr006 
 
_audit_creation_method          'SHELXL-97 + hand edit' 
_audit_creation_date            '2007-07-23'
_audit_author_name              'Webster, M.'

_chemical_name_systematic 
; 
 mu-oxido-bis{bis(eta5-cyclopentadienyl)(methylselenolato)zirconium(IV)}
; 
_chemical_name_common             ? 
_chemical_melting_point           ? 
_chemical_formula_moiety          'C22 H26 O Se2 Zr2'
_chemical_formula_sum             'C22 H26 O Se2 Zr2' 
_chemical_formula_weight          646.79 
 
loop_ 
 _atom_type_symbol 
 _atom_type_description 
 _atom_type_scat_dispersion_real 
 _atom_type_scat_dispersion_imag 
 _atom_type_scat_source 
 'C'  'C'   0.0033   0.0016 
 'International Tables Vol C Tables 4.2.6.8 and 6.1.1.4' 
 'H'  'H'   0.0000   0.0000 
 'International Tables Vol C Tables 4.2.6.8 and 6.1.1.4' 
 'Se'  'Se'  -0.0929   2.2259 
 'International Tables Vol C Tables 4.2.6.8 and 6.1.1.4' 
 'Zr'  'Zr'  -2.9673   0.5597 
 'International Tables Vol C Tables 4.2.6.8 and 6.1.1.4' 
 'O'  'O'   0.0106   0.0060 
 'International Tables Vol C Tables 4.2.6.8 and 6.1.1.4' 
 
_symmetry_cell_setting            triclinic 
_symmetry_space_group_name_H-M    'P -1'
_symmetry_Int_Tables_number        2          #  Superceded **
_symmetry_space_group_name_Hall   '-P 1'      #  Superceded **

 
loop_ 
 _symmetry_equiv_pos_as_xyz 
 'x, y, z' 
 '-x, -y, -z' 
 
_cell_length_a                    8.2833(10) 
_cell_length_b                    10.763(2) 
_cell_length_c                    13.944(3) 
_cell_angle_alpha                 69.034(10) 
_cell_angle_beta                  86.054(10) 
_cell_angle_gamma                 68.558(10) 
_cell_volume                      1077.7(3) 
_cell_formula_units_Z             2 
_cell_measurement_temperature     120(2) 
_cell_measurement_reflns_used     6218 
_cell_measurement_theta_min       1.0
_cell_measurement_theta_max       30.03
 
_exptl_crystal_description        block 
_exptl_crystal_colour            'pale yellow'
_exptl_crystal_size_max           0.90 #  
_exptl_crystal_size_mid           0.30 
_exptl_crystal_size_min           0.20 
_exptl_crystal_density_meas       ? 
_exptl_crystal_density_diffrn     1.993 
_exptl_crystal_density_method     'not measured' 
_exptl_crystal_F_000              628 
_exptl_absorpt_coefficient_mu     4.354 
_exptl_absorpt_correction_type    multi-scan 
_exptl_absorpt_correction_T_min   0.3953  
_exptl_absorpt_correction_T_max   1.0000   
_exptl_absorpt_process_details    
   'G.M. Sheldrick, (2003). SADABS. Version 2.10. Bruker AXS Inc.' 
 
_exptl_special_details 
; 
 ? 
; 
 
_diffrn_ambient_temperature       120(2) 
_diffrn_radiation_wavelength      0.71073 
_diffrn_radiation_type            MoK\a 
_diffrn_radiation_source          'Nonius rotating anode' 
_diffrn_radiation_monochromator   graphite 
_diffrn_measurement_device_type   'area detector, Nonius Kappa ccd'
_diffrn_measurement_method        '\f and \w scans' 
_diffrn_detector_area_resol_mean  ? 
_diffrn_standards_number          0 
_diffrn_standards_interval_count  ? 
_diffrn_standards_interval_time   ? 
_diffrn_standards_decay_%         0 
_diffrn_reflns_number             28777 
_diffrn_reflns_av_R_equivalents   0.0403 
_diffrn_reflns_av_sigmaI/netI     0.0338 
_diffrn_reflns_limit_h_min        -11 
_diffrn_reflns_limit_h_max        11 
_diffrn_reflns_limit_k_min        -15 
_diffrn_reflns_limit_k_max        15 
_diffrn_reflns_limit_l_min        -19 
_diffrn_reflns_limit_l_max        19 
_diffrn_reflns_theta_min          1.57 
_diffrn_reflns_theta_max          30.09 
_reflns_number_total              6312 
_reflns_number_gt                 5533 
_reflns_threshold_expression      I>2sigma(I) 
 
_computing_data_collection        ? 
_computing_cell_refinement        ? 
_computing_data_reduction         ? 
_computing_structure_solution     'SHELXS-97 (Sheldrick, 1997)' 
_computing_structure_refinement   'SHELXL-97 (Sheldrick, 1997)' 
_computing_molecular_graphics     ? 
_computing_publication_material   ? 
 
_refine_special_details 
; 
 Refinement of F^2^ against ALL reflections.  The weighted R-factor wR and 
 goodness of fit S are based on F^2^, conventional R-factors R are based 
 on F, with F set to zero for negative F^2^. The threshold expression of 
 F^2^ > 2sigma(F^2^) is used only for calculating R-factors(gt) etc. and is 
 not relevant to the choice of reflections for refinement.  R-factors based 
 on F^2^ are statistically about twice as large as those based on F, and R- 
 factors based on ALL data will be even larger. 
; 
 
_refine_ls_structure_factor_coef  Fsqd  
_refine_ls_matrix_type            full 
_refine_ls_weighting_scheme       calc  
_refine_ls_weighting_details 
 'w=1/[\s^2^(Fo^2^)+(0.0358P)^2^+1.2077P] where P=(Fo^2^+2Fc^2^)/3' 
_atom_sites_solution_primary      direct 
_atom_sites_solution_secondary    difmap 
_atom_sites_solution_hydrogens    geom 
_refine_ls_hydrogen_treatment     noref 
_refine_ls_extinction_method      none 
_refine_ls_extinction_coef        ? 
_refine_ls_number_reflns          6312 
_refine_ls_number_parameters      244 
_refine_ls_number_restraints      0 
_refine_ls_R_factor_all           0.0352 
_refine_ls_R_factor_gt            0.0274 
_refine_ls_wR_factor_ref          0.0693 
_refine_ls_wR_factor_gt           0.0662 
_refine_ls_goodness_of_fit_ref    1.011 
_refine_ls_restrained_S_all       1.011 
_refine_ls_shift/su_max           0.001 
_refine_ls_shift/su_mean          0.000 
 
loop_ 
 _atom_site_label 
 _atom_site_type_symbol 
 _atom_site_fract_x 
 _atom_site_fract_y 
 _atom_site_fract_z 
 _atom_site_U_iso_or_equiv 
 _atom_site_adp_type 
 _atom_site_occupancy 
 _atom_site_symmetry_multiplicity 
 _atom_site_calc_flag 
 _atom_site_refinement_flags 
 _atom_site_disorder_assembly 
 _atom_site_disorder_group 
Zr1 Zr 0.29999(3) 1.20075(2) 0.146779(16) 0.00898(5) Uani 1 1 d . . . 
Zr2 Zr 0.53666(3) 0.81872(2) 0.351346(16) 0.00908(5) Uani 1 1 d . . . 
Se1 Se 0.09815(3) 1.33415(3) 0.264409(18) 0.01489(6) Uani 1 1 d . . . 
Se2 Se 0.49980(3) 0.66051(3) 0.250493(18) 0.01409(6) Uani 1 1 d . . . 
O1 O 0.4285(2) 1.01242(17) 0.25052(12) 0.0128(3) Uani 1 1 d . . . 
C1 C 0.0848(3) 1.0946(3) 0.12263(19) 0.0171(5) Uani 1 1 d . . . 
H1 H 0.0350 1.0343 0.1793 0.020 Uiso 1 1 calc R . . 
C2 C 0.0042(3) 1.2437(3) 0.06984(18) 0.0171(5) Uani 1 1 d . . . 
H2 H -0.1111 1.3063 0.0835 0.021 Uiso 1 1 calc R . . 
C3 C 0.1032(3) 1.2847(3) -0.01390(18) 0.0174(5) Uani 1 1 d . . . 
H3 H 0.0690 1.3808 -0.0700 0.021 Uiso 1 1 calc R . . 
C4 C 0.2451(3) 1.1603(3) -0.01277(18) 0.0174(5) Uani 1 1 d . . . 
H4 H 0.3265 1.1542 -0.0687 0.021 Uiso 1 1 calc R . . 
C5 C 0.2328(3) 1.0425(3) 0.07068(19) 0.0174(5) Uani 1 1 d . . . 
H5 H 0.3039 0.9396 0.0838 0.021 Uiso 1 1 calc R . . 
C6 C 0.5523(4) 1.2489(3) 0.0553(2) 0.0251(6) Uani 1 1 d . . . 
H6 H 0.6308 1.1927 0.0155 0.030 Uiso 1 1 calc R . . 
C7 C 0.5871(3) 1.2311(3) 0.1583(2) 0.0220(5) Uani 1 1 d . . . 
H7 H 0.6922 1.1579 0.2040 0.026 Uiso 1 1 calc R . . 
C8 C 0.4623(3) 1.3441(3) 0.18046(19) 0.0158(5) Uani 1 1 d . . . 
H8 H 0.4624 1.3647 0.2449 0.019 Uiso 1 1 calc R . . 
C9 C 0.3514(3) 1.4357(3) 0.09005(19) 0.0168(5) Uani 1 1 d . . . 
H9 H 0.2603 1.5318 0.0802 0.020 Uiso 1 1 calc R . . 
C10 C 0.4082(4) 1.3784(3) 0.0128(2) 0.0228(6) Uani 1 1 d . . . 
H10 H 0.3661 1.4272 -0.0616 0.027 Uiso 1 1 calc R . . 
C11  C -0.0857(3) 1.2556(3) 0.3112(2) 0.0245(6) Uani 1 1 d . . . 
H11A H -0.1604 1.3042 0.3545 0.037 Uiso 1 1 calc R . . 
H11B H -0.0328 1.1530 0.3510 0.037 Uiso 1 1 calc R . . 
H11C H -0.1555 1.2704 0.2513 0.037 Uiso 1 1 calc R . . 
C12 C 0.4528(3) 0.8388(3) 0.52427(18) 0.0165(5) Uani 1 1 d . . . 
H12 H 0.5131 0.8697 0.5660 0.020 Uiso 1 1 calc R . . 
C13 C 0.4826(3) 0.6948(3) 0.53682(18) 0.0176(5) Uani 1 1 d . . . 
H13 H 0.5684 0.6076 0.5882 0.021 Uiso 1 1 calc R . . 
C14 C 0.3532(3) 0.6966(3) 0.47626(19) 0.0185(5) Uani 1 1 d . . . 
H14 H 0.3323 0.6106 0.4766 0.022 Uiso 1 1 calc R . . 
C15 C 0.2431(3) 0.8405(3) 0.42547(18) 0.0172(5) Uani 1 1 d . . . 
H15 H 0.1308 0.8729 0.3850 0.021 Uiso 1 1 calc R . . 
C16 C 0.3032(3) 0.9276(3) 0.45682(18) 0.0157(5) Uani 1 1 d . . . 
H16 H 0.2408 1.0321 0.4421 0.019 Uiso 1 1 calc R . . 
C17 C 0.8470(3) 0.6353(3) 0.3992(2) 0.0194(5) Uani 1 1 d . . . 
H17 H 0.8799 0.5303 0.4378 0.023 Uiso 1 1 calc R . . 
C18 C 0.8309(3) 0.7382(3) 0.4430(2) 0.0213(5) Uani 1 1 d . . . 
H18 H 0.8528 0.7184 0.5176 0.026 Uiso 1 1 calc R . . 
C19 C 0.8049(3) 0.8699(3) 0.3617(2) 0.0178(5) Uani 1 1 d . . . 
H19 H 0.8077 0.9579 0.3695 0.021 Uiso 1 1 calc R . . 
C20 C 0.8102(3) 0.8466(3) 0.26749(19) 0.0154(5) Uani 1 1 d . . . 
H20 H 0.8141 0.9163 0.1978 0.019 Uiso 1 1 calc R . . 
C21 C 0.8342(3) 0.7024(3) 0.29069(19) 0.0162(5) Uani 1 1 d . . . 
H21 H 0.8559 0.6527 0.2400 0.019 Uiso 1 1 calc R . . 
C22  C 0.2538(3) 0.6836(3) 0.2445(2) 0.0207(5) Uani 1 1 d . . . 
H22A H 0.2386 0.6260 0.2076 0.031 Uiso 1 1 calc R . . 
H22B H 0.1830 0.7845 0.2083 0.031 Uiso 1 1 calc R . . 
H22C H 0.2170 0.6520 0.3146 0.031 Uiso 1 1 calc R . . 
 
loop_ 
 _atom_site_aniso_label 
 _atom_site_aniso_U_11 
 _atom_site_aniso_U_22 
 _atom_site_aniso_U_33 
 _atom_site_aniso_U_23 
 _atom_site_aniso_U_13 
 _atom_site_aniso_U_12 
Zr1 0.00956(10) 0.00798(10) 0.00869(10) -0.00248(8) 0.00095(7) -0.00298(8) 
Zr2 0.00941(10) 0.00809(11) 0.00849(10) -0.00277(8) 0.00016(7) -0.00195(8) 
Se1 0.01580(11) 0.01407(12) 0.01415(11) -0.00716(9) 0.00400(8) -0.00321(9) 
Se2 0.01571(11) 0.01311(12) 0.01528(11) -0.00771(9) 0.00191(8) -0.00490(9) 
O1 0.0113(7) 0.0116(8) 0.0121(7) -0.0015(6) -0.0006(6) -0.0028(6) 
C1 0.0182(11) 0.0204(12) 0.0159(11) -0.0049(10) -0.0003(9) -0.0119(10) 
C2 0.0122(10) 0.0219(13) 0.0152(11) -0.0049(10) -0.0037(8) -0.0049(9) 
C3 0.0189(11) 0.0176(12) 0.0128(11) -0.0018(9) -0.0047(9) -0.0062(10) 
C4 0.0191(11) 0.0221(13) 0.0129(11) -0.0076(10) 0.0004(9) -0.0082(10) 
C5 0.0218(12) 0.0130(12) 0.0197(12) -0.0083(10) -0.0043(9) -0.0056(10) 
C6 0.0257(13) 0.0285(15) 0.0376(16) -0.0228(13) 0.0214(12) -0.0208(12) 
C7 0.0130(11) 0.0168(13) 0.0374(15) -0.0086(11) 0.0020(10) -0.0080(10) 
C8 0.0191(11) 0.0150(12) 0.0168(11) -0.0048(9) 0.0017(9) -0.0109(10) 
C9 0.0196(11) 0.0120(11) 0.0202(12) -0.0039(9) 0.0013(9) -0.0091(10) 
C10 0.0368(15) 0.0272(14) 0.0132(11) -0.0046(10) 0.0067(10) -0.0249(13) 
C11 0.0199(12) 0.0336(16) 0.0206(12) -0.0092(11) 0.0076(10) -0.0119(12) 
C12 0.0213(12) 0.0171(12) 0.0112(10) -0.0060(9) 0.0027(9) -0.0066(10) 
C13 0.0248(12) 0.0142(12) 0.0093(10) -0.0024(9) 0.0053(9) -0.0046(10) 
C14 0.0255(13) 0.0179(12) 0.0155(11) -0.0066(9) 0.0098(9) -0.0125(11) 
C15 0.0146(11) 0.0242(13) 0.0144(11) -0.0088(10) 0.0068(8) -0.0079(10) 
C16 0.0159(11) 0.0162(12) 0.0122(10) -0.0059(9) 0.0060(8) -0.0027(9) 
C17 0.0116(10) 0.0170(12) 0.0211(12) -0.0040(10) -0.0039(9) 0.0021(9) 
C18 0.0114(10) 0.0323(15) 0.0165(11) -0.0087(11) -0.0033(9) -0.0034(10) 
C19 0.0123(10) 0.0219(13) 0.0242(12) -0.0132(10) 0.0009(9) -0.0069(10) 
C20 0.0086(10) 0.0180(12) 0.0178(11) -0.0052(9) 0.0015(8) -0.0041(9) 
C21 0.0104(10) 0.0182(12) 0.0197(11) -0.0096(10) 0.0022(8) -0.0024(9) 
C22 0.0182(12) 0.0181(13) 0.0288(13) -0.0108(11) 0.0011(10) -0.0075(10) 
 
_geom_special_details 
; 
 All esds (except the esd in the dihedral angle between two l.s. planes) 
 are estimated using the full covariance matrix.  The cell esds are taken 
 into account individually in the estimation of esds in distances, angles 
 and torsion angles; correlations between esds in cell parameters are only 
 used when they are defined by crystal symmetry.  An approximate (isotropic) 
 treatment of cell esds is used for estimating esds involving l.s. planes. 
; 
 
loop_ 
 _geom_bond_atom_site_label_1 
 _geom_bond_atom_site_label_2 
 _geom_bond_distance 
 _geom_bond_site_symmetry_2 
 _geom_bond_publ_flag 
Zr1 O1 1.9675(16) . ? 
Zr1 C6 2.493(2) . ? 
Zr1 C4 2.515(2) . ? 
Zr1 C5 2.531(2) . ? 
Zr1 C10 2.533(2) . ? 
Zr1 C1 2.538(2) . ? 
Zr1 C7 2.538(2) . ? 
Zr1 C3 2.544(2) . ? 
Zr1 C9 2.552(2) . ? 
Zr1 C8 2.555(2) . ? 
Zr1 C2 2.558(2) . ? 
Zr1 Se1 2.6645(5) . ? 
Zr2 O1 1.9585(16) . ? 
Zr2 C19 2.502(2) . ? 
Zr2 C12 2.525(2) . ? 
Zr2 C18 2.533(2) . ? 
Zr2 C15 2.539(2) . ? 
Zr2 C16 2.541(2) . ? 
Zr2 C20 2.544(2) . ? 
Zr2 C13 2.545(2) . ? 
Zr2 C14 2.555(2) . ? 
Zr2 C17 2.556(2) . ? 
Zr2 C21 2.564(2) . ? 
Zr2 Se2 2.6689(5) . ? 
Se1 C11 1.967(3) . ? 
Se2 C22 1.965(3) . ? 
C1 C2 1.415(4) . ? 
C1 C5 1.417(4) . ? 
C1 H1 1.0000 . ? 
C2 C3 1.412(3) . ? 
C2 H2 1.0000 . ? 
C3 C4 1.419(4) . ? 
C3 H3 1.0000 . ? 
C4 C5 1.412(3) . ? 
C4 H4 1.0000 . ? 
C5 H5 1.0000 . ? 
C6 C7 1.414(4) . ? 
C6 C10 1.417(4) . ? 
C6 H6 1.0000 . ? 
C7 C8 1.396(4) . ? 
C7 H7 1.0000 . ? 
C8 C9 1.419(3) . ? 
C8 H8 1.0000 . ? 
C9 C10 1.399(4) . ? 
C9 H9 1.0000 . ? 
C10 H10 1.0000 . ? 
C11 H11A 0.9800 . ? 
C11 H11B 0.9800 . ? 
C11 H11C 0.9800 . ? 
C12 C16 1.408(3) . ? 
C12 C13 1.424(4) . ? 
C12 H12 1.0000 . ? 
C13 C14 1.400(4) . ? 
C13 H13 1.0000 . ? 
C14 C15 1.416(4) . ? 
C14 H14 1.0000 . ? 
C15 C16 1.408(4) . ? 
C15 H15 1.0000 . ? 
C16 H16 1.0000 . ? 
C17 C18 1.409(4) . ? 
C17 C21 1.416(4) . ? 
C17 H17 1.0000 . ? 
C18 C19 1.414(4) . ? 
C18 H18 1.0000 . ? 
C19 C20 1.418(3) . ? 
C19 H19 1.0000 . ? 
C20 C21 1.407(4) . ? 
C20 H20 1.0000 . ? 
C21 H21 1.0000 . ? 
C22 H22A 0.9800 . ? 
C22 H22B 0.9800 . ? 
C22 H22C 0.9800 . ? 
 
loop_ 
 _geom_angle_atom_site_label_1 
 _geom_angle_atom_site_label_2 
 _geom_angle_atom_site_label_3 
 _geom_angle 
 _geom_angle_site_symmetry_1 
 _geom_angle_site_symmetry_3 
 _geom_angle_publ_flag 
O1 Zr1 C6 98.31(9) . . ? 
O1 Zr1 C4 107.31(8) . . ? 
C6 Zr1 C4 83.16(9) . . ? 
O1 Zr1 C5 80.41(8) . . ? 
C6 Zr1 C5 104.92(9) . . ? 
C4 Zr1 C5 32.50(8) . . ? 
O1 Zr1 C10 130.66(8) . . ? 
C6 Zr1 C10 32.75(10) . . ? 
C4 Zr1 C10 79.63(9) . . ? 
C5 Zr1 C10 111.03(9) . . ? 
O1 Zr1 C1 87.04(8) . . ? 
C6 Zr1 C1 135.75(9) . . ? 
C4 Zr1 C1 53.72(8) . . ? 
C5 Zr1 C1 32.46(8) . . ? 
C10 Zr1 C1 128.82(8) . . ? 
O1 Zr1 C7 81.15(8) . . ? 
C6 Zr1 C7 32.62(10) . . ? 
C4 Zr1 C7 114.70(9) . . ? 
C5 Zr1 C7 128.49(9) . . ? 
C10 Zr1 C7 53.56(9) . . ? 
C1 Zr1 C7 159.89(9) . . ? 
O1 Zr1 C3 134.09(8) . . ? 
C6 Zr1 C3 96.42(9) . . ? 
C4 Zr1 C3 32.57(8) . . ? 
C5 Zr1 C3 53.77(8) . . ? 
C10 Zr1 C3 76.14(9) . . ? 
C1 Zr1 C3 53.50(8) . . ? 
C7 Zr1 C3 127.66(9) . . ? 
O1 Zr1 C9 130.81(7) . . ? 
C6 Zr1 C9 53.64(9) . . ? 
C4 Zr1 C9 107.73(8) . . ? 
C5 Zr1 C9 140.23(8) . . ? 
C10 Zr1 C9 31.94(8) . . ? 
C1 Zr1 C9 141.97(8) . . ? 
C7 Zr1 C9 53.12(8) . . ? 
C3 Zr1 C9 92.33(8) . . ? 
O1 Zr1 C8 98.99(7) . . ? 
C6 Zr1 C8 53.63(8) . . ? 
C4 Zr1 C8 132.25(8) . . ? 
C5 Zr1 C8 158.42(8) . . ? 
C10 Zr1 C8 53.30(8) . . ? 
C1 Zr1 C8 168.26(8) . . ? 
C7 Zr1 C8 31.82(8) . . ? 
C3 Zr1 C8 124.38(8) . . ? 
C9 Zr1 C8 32.26(8) . . ? 
O1 Zr1 C2 118.57(8) . . ? 
C6 Zr1 C2 128.54(9) . . ? 
C4 Zr1 C2 53.57(8) . . ? 
C5 Zr1 C2 53.57(8) . . ? 
C10 Zr1 C2 104.87(9) . . ? 
C1 Zr1 C2 32.23(8) . . ? 
C7 Zr1 C2 158.41(9) . . ? 
C3 Zr1 C2 32.13(8) . . ? 
C9 Zr1 C2 109.87(8) . . ? 
C8 Zr1 C2 138.98(8) . . ? 
O1 Zr1 Se1 101.14(5) . . ? 
C6 Zr1 Se1 127.34(6) . . ? 
C4 Zr1 Se1 134.31(6) . . ? 
C5 Zr1 Se1 126.30(6) . . ? 
C10 Zr1 Se1 107.58(7) . . ? 
C1 Zr1 Se1 93.86(6) . . ? 
C7 Zr1 Se1 104.31(7) . . ? 
C3 Zr1 Se1 103.71(6) . . ? 
C9 Zr1 Se1 77.11(6) . . ? 
C8 Zr1 Se1 75.15(6) . . ? 
C2 Zr1 Se1 81.58(6) . . ? 
O1 Zr2 C19 89.12(8) . . ? 
O1 Zr2 C12 105.34(8) . . ? 
C19 Zr2 C12 91.75(8) . . ? 
O1 Zr2 C18 121.19(8) . . ? 
C19 Zr2 C18 32.61(9) . . ? 
C12 Zr2 C18 78.21(8) . . ? 
O1 Zr2 C15 88.76(8) . . ? 
C19 Zr2 C15 143.03(8) . . ? 
C12 Zr2 C15 53.54(8) . . ? 
C18 Zr2 C15 129.42(8) . . ? 
O1 Zr2 C16 80.13(7) . . ? 
C19 Zr2 C16 111.41(8) . . ? 
C12 Zr2 C16 32.27(8) . . ? 
C18 Zr2 C16 108.44(8) . . ? 
C15 Zr2 C16 32.18(8) . . ? 
O1 Zr2 C20 81.94(7) . . ? 
C19 Zr2 C20 32.62(8) . . ? 
C12 Zr2 C20 124.35(8) . . ? 
C18 Zr2 C20 53.63(8) . . ? 
C15 Zr2 C20 169.46(8) . . ? 
C16 Zr2 C20 139.78(8) . . ? 
O1 Zr2 C13 133.58(8) . . ? 
C19 Zr2 C13 105.47(9) . . ? 
C12 Zr2 C13 32.62(8) . . ? 
C18 Zr2 C13 78.33(9) . . ? 
C15 Zr2 C13 53.37(8) . . ? 
C16 Zr2 C13 53.47(8) . . ? 
C20 Zr2 C13 131.82(8) . . ? 
O1 Zr2 C14 120.72(8) . . ? 
C19 Zr2 C14 137.28(9) . . ? 
C12 Zr2 C14 53.37(8) . . ? 
C18 Zr2 C14 108.11(9) . . ? 
C15 Zr2 C14 32.27(9) . . ? 
C16 Zr2 C14 53.19(8) . . ? 
C20 Zr2 C14 157.34(8) . . ? 
C13 Zr2 C14 31.86(8) . . ? 
O1 Zr2 C17 135.15(8) . . ? 
C19 Zr2 C17 53.63(9) . . ? 
C12 Zr2 C17 100.34(8) . . ? 
C18 Zr2 C17 32.13(9) . . ? 
C15 Zr2 C17 135.79(8) . . ? 
C16 Zr2 C17 132.56(8) . . ? 
C20 Zr2 C17 53.22(8) . . ? 
C13 Zr2 C17 84.99(8) . . ? 
C14 Zr2 C17 104.12(9) . . ? 
O1 Zr2 C21 107.72(7) . . ? 
C19 Zr2 C21 53.58(8) . . ? 
C12 Zr2 C21 130.53(8) . . ? 
C18 Zr2 C21 53.31(8) . . ? 
C15 Zr2 C21 158.43(8) . . ? 
C16 Zr2 C21 161.73(8) . . ? 
C20 Zr2 C21 31.97(8) . . ? 
C13 Zr2 C21 116.46(8) . . ? 
C14 Zr2 C21 128.29(8) . . ? 
C17 Zr2 C21 32.11(8) . . ? 
O1 Zr2 Se2 101.60(5) . . ? 
C19 Zr2 Se2 125.18(6) . . ? 
C12 Zr2 Se2 134.22(6) . . ? 
C18 Zr2 Se2 117.21(7) . . ? 
C15 Zr2 Se2 91.32(6) . . ? 
C16 Zr2 Se2 123.35(6) . . ? 
C20 Zr2 Se2 95.38(6) . . ? 
C13 Zr2 Se2 104.64(6) . . ? 
C14 Zr2 Se2 81.09(6) . . ? 
C17 Zr2 Se2 85.09(6) . . ? 
C21 Zr2 Se2 72.12(6) . . ? 
C11 Se1 Zr1 109.05(9) . . ? 
C22 Se2 Zr2 108.70(8) . . ? 
Zr2 O1 Zr1 173.92(9) . . ? 
C2 C1 C5 108.2(2) . . ? 
C2 C1 Zr1 74.67(14) . . ? 
C5 C1 Zr1 73.48(14) . . ? 
C2 C1 H1 125.5 . . ? 
C5 C1 H1 125.5 . . ? 
Zr1 C1 H1 125.5 . . ? 
C3 C2 C1 108.1(2) . . ? 
C3 C2 Zr1 73.37(14) . . ? 
C1 C2 Zr1 73.10(13) . . ? 
C3 C2 H2 125.7 . . ? 
C1 C2 H2 125.7 . . ? 
Zr1 C2 H2 125.7 . . ? 
C2 C3 C4 107.8(2) . . ? 
C2 C3 Zr1 74.51(14) . . ? 
C4 C3 Zr1 72.59(14) . . ? 
C2 C3 H3 125.8 . . ? 
C4 C3 H3 125.8 . . ? 
Zr1 C3 H3 125.8 . . ? 
C5 C4 C3 108.3(2) . . ? 
C5 C4 Zr1 74.37(14) . . ? 
C3 C4 Zr1 74.84(14) . . ? 
C5 C4 H4 125.4 . . ? 
C3 C4 H4 125.4 . . ? 
Zr1 C4 H4 125.4 . . ? 
C4 C5 C1 107.6(2) . . ? 
C4 C5 Zr1 73.13(14) . . ? 
C1 C5 Zr1 74.06(14) . . ? 
C4 C5 H5 125.8 . . ? 
C1 C5 H5 125.8 . . ? 
Zr1 C5 H5 125.8 . . ? 
C7 C6 C10 107.6(2) . . ? 
C7 C6 Zr1 75.45(14) . . ? 
C10 C6 Zr1 75.16(14) . . ? 
C7 C6 H6 125.5 . . ? 
C10 C6 H6 125.5 . . ? 
Zr1 C6 H6 125.5 . . ? 
C8 C7 C6 108.3(2) . . ? 
C8 C7 Zr1 74.75(14) . . ? 
C6 C7 Zr1 71.93(14) . . ? 
C8 C7 H7 125.6 . . ? 
C6 C7 H7 125.6 . . ? 
Zr1 C7 H7 125.6 . . ? 
C7 C8 C9 107.9(2) . . ? 
C7 C8 Zr1 73.43(14) . . ? 
C9 C8 Zr1 73.76(14) . . ? 
C7 C8 H8 125.7 . . ? 
C9 C8 H8 125.7 . . ? 
Zr1 C8 H8 125.7 . . ? 
C10 C9 C8 108.2(2) . . ? 
C10 C9 Zr1 73.27(14) . . ? 
C8 C9 Zr1 73.99(14) . . ? 
C10 C9 H9 125.6 . . ? 
C8 C9 H9 125.6 . . ? 
Zr1 C9 H9 125.6 . . ? 
C9 C10 C6 107.9(2) . . ? 
C9 C10 Zr1 74.79(14) . . ? 
C6 C10 Zr1 72.09(14) . . ? 
C9 C10 H10 125.8 . . ? 
C6 C10 H10 125.8 . . ? 
Zr1 C10 H10 125.8 . . ? 
Se1 C11 H11A 109.5 . . ? 
Se1 C11 H11B 109.5 . . ? 
H11A C11 H11B 109.5 . . ? 
Se1 C11 H11C 109.5 . . ? 
H11A C11 H11C 109.5 . . ? 
H11B C11 H11C 109.5 . . ? 
C16 C12 C13 107.8(2) . . ? 
C16 C12 Zr2 74.50(13) . . ? 
C13 C12 Zr2 74.46(13) . . ? 
C16 C12 H12 125.6 . . ? 
C13 C12 H12 125.6 . . ? 
Zr2 C12 H12 125.6 . . ? 
C14 C13 C12 107.8(2) . . ? 
C14 C13 Zr2 74.47(14) . . ? 
C12 C13 Zr2 72.93(13) . . ? 
C14 C13 H13 125.8 . . ? 
C12 C13 H13 125.8 . . ? 
Zr2 C13 H13 125.8 . . ? 
C13 C14 C15 108.4(2) . . ? 
C13 C14 Zr2 73.67(14) . . ? 
C15 C14 Zr2 73.25(13) . . ? 
C13 C14 H14 125.6 . . ? 
C15 C14 H14 125.6 . . ? 
Zr2 C14 H14 125.6 . . ? 
C16 C15 C14 107.8(2) . . ? 
C16 C15 Zr2 74.00(13) . . ? 
C14 C15 Zr2 74.48(14) . . ? 
C16 C15 H15 125.7 . . ? 
C14 C15 H15 125.7 . . ? 
Zr2 C15 H15 125.7 . . ? 
C15 C16 C12 108.2(2) . . ? 
C15 C16 Zr2 73.82(13) . . ? 
C12 C16 Zr2 73.23(13) . . ? 
C15 C16 H16 125.6 . . ? 
C12 C16 H16 125.6 . . ? 
Zr2 C16 H16 125.6 . . ? 
C18 C17 C21 108.1(2) . . ? 
C18 C17 Zr2 73.03(14) . . ? 
C21 C17 Zr2 74.22(13) . . ? 
C18 C17 H17 125.6 . . ? 
C21 C17 H17 125.6 . . ? 
Zr2 C17 H17 125.6 . . ? 
C17 C18 C19 107.9(2) . . ? 
C17 C18 Zr2 74.84(14) . . ? 
C19 C18 Zr2 72.46(14) . . ? 
C17 C18 H18 125.7 . . ? 
C19 C18 H18 125.7 . . ? 
Zr2 C18 H18 125.7 . . ? 
C18 C19 C20 108.0(2) . . ? 
C18 C19 Zr2 74.93(14) . . ? 
C20 C19 Zr2 75.35(13) . . ? 
C18 C19 H19 125.4 . . ? 
C20 C19 H19 125.4 . . ? 
Zr2 C19 H19 125.4 . . ? 
C21 C20 C19 107.9(2) . . ? 
C21 C20 Zr2 74.76(13) . . ? 
C19 C20 Zr2 72.03(13) . . ? 
C21 C20 H20 125.8 . . ? 
C19 C20 H20 125.8 . . ? 
Zr2 C20 H20 125.8 . . ? 
C20 C21 C17 108.1(2) . . ? 
C20 C21 Zr2 73.26(13) . . ? 
C17 C21 Zr2 73.67(14) . . ? 
C20 C21 H21 125.7 . . ? 
C17 C21 H21 125.7 . . ? 
Zr2 C21 H21 125.7 . . ? 
Se2 C22 H22A 109.5 . . ? 
Se2 C22 H22B 109.5 . . ? 
H22A C22 H22B 109.5 . . ? 
Se2 C22 H22C 109.5 . . ? 
H22A C22 H22C 109.5 . . ? 
H22B C22 H22C 109.5 . . ? 
 
_diffrn_measured_fraction_theta_max    0.994 
_diffrn_reflns_theta_full              30.09 
_diffrn_measured_fraction_theta_full   0.994 
_refine_diff_density_max    0.670 
_refine_diff_density_min   -0.995 
_refine_diff_density_rms    0.132 


#===END OF CIF ==============================================================
# 06sdr004b.cif  [Cp2Ti(SeBu)2]  CCDC-670753

 
data_06sdr004 

_audit_creation_method          'SHELXL-97 + hand edit' 
_audit_creation_date            '2007-07-27'
_audit_author_name              'Webster, M.'
 
 
_chemical_name_systematic 
; 
 bis(eta5-cyclopentadienyl)bis(t-butylselenolato)titanium(IV)  
; 
_chemical_name_common             ? 
_chemical_melting_point           ? 
_chemical_formula_moiety         'C18 H28 Se2 Ti' 
_chemical_formula_sum            'C18 H28 Se2 Ti' 
_chemical_formula_weight          450.22 
 
loop_ 
 _atom_type_symbol 
 _atom_type_description 
 _atom_type_scat_dispersion_real 
 _atom_type_scat_dispersion_imag 
 _atom_type_scat_source 
 'C'  'C'   0.0033   0.0016 
 'International Tables Vol C Tables 4.2.6.8 and 6.1.1.4' 
 'H'  'H'   0.0000   0.0000 
 'International Tables Vol C Tables 4.2.6.8 and 6.1.1.4' 
 'Ti'  'Ti'   0.2776   0.4457 
 'International Tables Vol C Tables 4.2.6.8 and 6.1.1.4' 
 'Se'  'Se'  -0.0929   2.2259 
 'International Tables Vol C Tables 4.2.6.8 and 6.1.1.4' 

_symmetry_cell_setting            monoclinic 
_symmetry_space_group_name_H-M    'C 2/c'
_symmetry_Int_Tables_number        15          #  Superceded **
_symmetry_space_group_name_Hall   '-C 2yc'     #  Superceded **
 
 
 
loop_ 
 _symmetry_equiv_pos_as_xyz 
 'x, y, z' 
 '-x, y, -z+1/2' 
 'x+1/2, y+1/2, z' 
 '-x+1/2, y+1/2, -z+1/2' 
 '-x, -y, -z' 
 'x, -y, z-1/2' 
 '-x+1/2, -y+1/2, -z' 
 'x+1/2, -y+1/2, z-1/2' 
 
_cell_length_a                    16.434(4) 
_cell_length_b                    9.3217(17) 
_cell_length_c                    12.668(2) 
_cell_angle_alpha                 90.00 
_cell_angle_beta                  108.391(15) 
_cell_angle_gamma                 90.00 
_cell_volume                      1841.5(6) 
_cell_formula_units_Z             4 
_cell_measurement_temperature     120(2) 
_cell_measurement_reflns_used     3517 
_cell_measurement_theta_min       1.00
_cell_measurement_theta_max       27.48
 
_exptl_crystal_description        plate 
_exptl_crystal_colour            'dark green'
_exptl_crystal_size_max           0.20 
_exptl_crystal_size_mid           0.08 
_exptl_crystal_size_min           0.01 
_exptl_crystal_density_meas       ? 
_exptl_crystal_density_diffrn     1.624 
_exptl_crystal_density_method     'not measured' 
_exptl_crystal_F_000              904 
_exptl_absorpt_coefficient_mu     4.410
_exptl_absorpt_correction_type    multi-scan 
_exptl_absorpt_correction_T_min   0.5575 # 0.4725 
_exptl_absorpt_correction_T_max   1.0000 # 0.9572 
_exptl_absorpt_process_details
   'G.M. Sheldrick, (2003). SADABS. Version 2.10. Bruker AXS Inc.'     
 
_exptl_special_details 
; 
 The original data was measured using a primitive triclinic cell. Inspection
 of the Niggli matrix suggested the basis vectors could be transformed to
 a C-centred monoclinic cell and visual inpection of the transformed data
 showed convincing 2/m Laue symmetry. The structure is reported in
 space group C2/c with Z=4 and Ti1 positioned on a 2-fold axis. The 
 three Me groups on the t-butyl group show disorder modelled as two
 orientations (A & B) of the methyl groups.
; 
 
_diffrn_ambient_temperature       120(2) 
_diffrn_radiation_wavelength      0.71073 
_diffrn_radiation_type            MoK\a 
_diffrn_radiation_source           'Bruker-Nonius FR591 rotating anode' 
_diffrn_radiation_monochromator    'graphite'
_diffrn_measurement_device_type 
                        'Bruker-Nonius 95mm CCD camera on \k-goniostat' 
_diffrn_measurement_method         '\f & \w scans'
_diffrn_detector_area_resol_mean  ? 
_diffrn_standards_number          0 
_diffrn_standards_interval_count  ? 
_diffrn_standards_interval_time   ? 
_diffrn_standards_decay_%         0 
_diffrn_reflns_number             14419 
_diffrn_reflns_av_R_equivalents   0.2555 
_diffrn_reflns_av_sigmaI/netI     0.2605 
_diffrn_reflns_limit_h_min        -20 
_diffrn_reflns_limit_h_max        20 
_diffrn_reflns_limit_k_min        -12 
_diffrn_reflns_limit_k_max        11 
_diffrn_reflns_limit_l_min        -16 
_diffrn_reflns_limit_l_max        16 
_diffrn_reflns_theta_min          2.55 
_diffrn_reflns_theta_max          28.20 
_reflns_number_total              2088 
_reflns_number_gt                 850 
_reflns_threshold_expression      I>2sigma(I) 
 
_computing_data_collection        ? 
_computing_cell_refinement        ? 
_computing_data_reduction         ? 
_computing_structure_solution     'SHELXS-97 (Sheldrick, 1997)' 
_computing_structure_refinement   'SHELXL-97 (Sheldrick, 1997)' 
_computing_molecular_graphics     ? 
_computing_publication_material   ? 
 
_refine_special_details 
; 
 Refinement of F^2^ against ALL reflections.  The weighted R-factor wR and 
 goodness of fit S are based on F^2^, conventional R-factors R are based 
 on F, with F set to zero for negative F^2^. The threshold expression of 
 F^2^ > 2sigma(F^2^) is used only for calculating R-factors(gt) etc. and is 
 not relevant to the choice of reflections for refinement.  R-factors based 
 on F^2^ are statistically about twice as large as those based on F, and R- 
 factors based on ALL data will be even larger. 
; 
 
_refine_ls_structure_factor_coef  Fsqd  
_refine_ls_matrix_type            full 
_refine_ls_weighting_scheme       calc  
_refine_ls_weighting_details 
 'w=1/[\s^2^(Fo^2^)+(0.1074P)^2^+0.0000P] where P=(Fo^2^+2Fc^2^)/3' 
_atom_sites_solution_primary      direct 
_atom_sites_solution_secondary    difmap 
_atom_sites_solution_hydrogens    geom 
_refine_ls_hydrogen_treatment     noref 
_refine_ls_extinction_method      none 
_refine_ls_extinction_coef        ? 
_refine_ls_number_reflns          2088 
_refine_ls_number_parameters      94 
_refine_ls_number_restraints      0 
_refine_ls_R_factor_all           0.2528 
_refine_ls_R_factor_gt            0.0860 
_refine_ls_wR_factor_ref          0.2412 
_refine_ls_wR_factor_gt           0.1780 
_refine_ls_goodness_of_fit_ref    1.004 
_refine_ls_restrained_S_all       1.004 
_refine_ls_shift/su_max           0.000 
_refine_ls_shift/su_mean          0.000 
 
loop_ 
 _atom_site_label 
 _atom_site_type_symbol 
 _atom_site_fract_x 
 _atom_site_fract_y 
 _atom_site_fract_z 
 _atom_site_U_iso_or_equiv 
 _atom_site_adp_type 
 _atom_site_occupancy 
 _atom_site_symmetry_multiplicity 
 _atom_site_calc_flag 
 _atom_site_refinement_flags 
 _atom_site_disorder_assembly 
 _atom_site_disorder_group 
Ti1 Ti 0.0000 0.7367(3) 0.2500 0.0446(9) Uani 1 2 d S . . 
Se1 Se 0.10082(8) 0.55987(12) 0.20227(9) 0.0444(5) Uani 1 1 d . A . 
C1 C -0.0561(10) 0.7164(14) 0.0533(10) 0.057(4) Uani 1 1 d . . . 
H1 H -0.0587 0.6265 0.0093 0.068 Uiso 1 1 calc R . . 
C2 C 0.0098(9) 0.8212(15) 0.0757(10) 0.060(4) Uani 1 1 d . . . 
H2 H 0.0619 0.8171 0.0512 0.073 Uiso 1 1 calc R . . 
C3 C -0.0158(14) 0.9369(16) 0.1256(12) 0.082(5) Uani 1 1 d . . . 
H3 H 0.0153 1.0304 0.1441 0.098 Uiso 1 1 calc R . . 
C4 C -0.0939(15) 0.9073(18) 0.1365(12) 0.086(6) Uani 1 1 d . . . 
H4 H -0.1302 0.9766 0.1621 0.103 Uiso 1 1 calc R . . 
C5 C -0.1210(10) 0.7704(18) 0.0883(11) 0.072(4) Uani 1 1 d . . . 
H5 H -0.1791 0.7271 0.0743 0.087 Uiso 1 1 calc R . . 
C6 C 0.1650(8) 0.4142(14) 0.3141(11) 0.057(4) Uani 1 1 d . . . 
C7A C 0.1649(19) 0.269(3) 0.248(3) 0.066(4) Uani 0.508(13) 1 d P A 1 
H7A H 0.1959 0.1946 0.3003 0.099 Uiso 0.508(13) 1 calc PR A 1 
H7B H 0.1931 0.2846 0.1916 0.099 Uiso 0.508(13) 1 calc PR A 1 
H7C H 0.1057 0.2375 0.2122 0.099 Uiso 0.508(13) 1 calc PR A 1 
C8A C 0.2642(17) 0.457(3) 0.363(3) 0.066(4) Uani 0.508(13) 1 d P A 1 
H8A H 0.2947 0.3846 0.4173 0.099 Uiso 0.508(13) 1 calc PR A 1 
H8B H 0.2696 0.5508 0.3993 0.099 Uiso 0.508(13) 1 calc PR A 1 
H8C H 0.2891 0.4613 0.3021 0.099 Uiso 0.508(13) 1 calc PR A 1 
C9A C 0.1355(18) 0.384(3) 0.409(2) 0.066(4) Uani 0.508(13) 1 d P A 1 
H9A H 0.1727 0.3111 0.4560 0.099 Uiso 0.508(13) 1 calc PR A 1 
H9B H 0.0765 0.3474 0.3818 0.099 Uiso 0.508(13) 1 calc PR A 1 
H9C H 0.1373 0.4717 0.4515 0.099 Uiso 0.508(13) 1 calc PR A 1 
C7B C 0.2005(19) 0.329(3) 0.247(3) 0.066(4) Uani 0.492(13) 1 d P A 2 
H7D H 0.2345 0.2512 0.2921 0.099 Uiso 0.492(13) 1 calc PR A 2 
H7E H 0.2374 0.3884 0.2175 0.099 Uiso 0.492(13) 1 calc PR A 2 
H7F H 0.1542 0.2880 0.1853 0.099 Uiso 0.492(13) 1 calc PR A 2 
C8B C 0.2200(19) 0.483(3) 0.419(2) 0.066(4) Uani 0.492(13) 1 d P A 2 
H8D H 0.2503 0.4085 0.4714 0.099 Uiso 0.492(13) 1 calc PR A 2 
H8E H 0.1840 0.5390 0.4525 0.099 Uiso 0.492(13) 1 calc PR A 2 
H8F H 0.2618 0.5464 0.4023 0.099 Uiso 0.492(13) 1 calc PR A 2 
C9B C 0.0937(18) 0.319(3) 0.345(3) 0.066(4) Uani 0.492(13) 1 d P A 2 
H9D H 0.1222 0.2453 0.3993 0.099 Uiso 0.492(13) 1 calc PR A 2 
H9E H 0.0568 0.2718 0.2771 0.099 Uiso 0.492(13) 1 calc PR A 2 
H9F H 0.0588 0.3803 0.3758 0.099 Uiso 0.492(13) 1 calc PR A 2 
 
loop_ 
 _atom_site_aniso_label 
 _atom_site_aniso_U_11 
 _atom_site_aniso_U_22 
 _atom_site_aniso_U_33 
 _atom_site_aniso_U_23 
 _atom_site_aniso_U_13 
 _atom_site_aniso_U_12 
Ti1 0.066(2) 0.0345(18) 0.0306(17) 0.000 0.0109(16) 0.000 
Se1 0.0478(8) 0.0485(8) 0.0358(7) -0.0010(6) 0.0117(6) -0.0038(7) 
C1 0.094(12) 0.051(9) 0.021(6) 0.009(6) 0.011(7) 0.011(9) 
C2 0.083(11) 0.063(10) 0.032(7) 0.018(7) 0.013(7) -0.018(9) 
C3 0.157(19) 0.046(10) 0.042(9) 0.005(7) 0.031(11) 0.007(11) 
C4 0.161(19) 0.066(13) 0.042(9) 0.027(8) 0.047(11) 0.063(12) 
C5 0.082(12) 0.089(13) 0.035(8) 0.025(8) 0.003(8) 0.023(10) 
C6 0.058(9) 0.060(9) 0.057(9) -0.007(7) 0.025(7) 0.002(7) 
C7A 0.050(9) 0.060(9) 0.073(8) 0.008(7) -0.002(6) 0.018(6) 
C8A 0.050(9) 0.060(9) 0.073(8) 0.008(7) -0.002(6) 0.018(6) 
C9A 0.050(9) 0.060(9) 0.073(8) 0.008(7) -0.002(6) 0.018(6) 
C7B 0.050(9) 0.060(9) 0.073(8) 0.008(7) -0.002(6) 0.018(6) 
C8B 0.050(9) 0.060(9) 0.073(8) 0.008(7) -0.002(6) 0.018(6) 
C9B 0.050(9) 0.060(9) 0.073(8) 0.008(7) -0.002(6) 0.018(6) 
 
_geom_special_details 
; 
 All esds (except the esd in the dihedral angle between two l.s. planes) 
 are estimated using the full covariance matrix.  The cell esds are taken 
 into account individually in the estimation of esds in distances, angles 
 and torsion angles; correlations between esds in cell parameters are only 
 used when they are defined by crystal symmetry.  An approximate (isotropic) 
 treatment of cell esds is used for estimating esds involving l.s. planes. 
; 
 
loop_ 
 _geom_bond_atom_site_label_1 
 _geom_bond_atom_site_label_2 
 _geom_bond_distance 
 _geom_bond_site_symmetry_2 
 _geom_bond_publ_flag 
Ti1 C4 2.361(15) 2 ? 
Ti1 C4 2.361(15) . ? 
Ti1 C1 2.376(12) . ? 
Ti1 C1 2.376(12) 2 ? 
Ti1 C5 2.383(13) 2 ? 
Ti1 C5 2.383(13) . ? 
Ti1 C2 2.397(11) 2 ? 
Ti1 C2 2.397(11) . ? 
Ti1 C3 2.404(14) 2 ? 
Ti1 C3 2.404(14) . ? 
Ti1 Se1 2.542(2) 2 ? 
Ti1 Se1 2.542(2) . ? 
Se1 C6 2.005(13) . ? 
C1 C5 1.373(19) . ? 
C1 C2 1.418(17) . ? 
C1 H1 1.0000 . ? 
C2 C3 1.380(19) . ? 
C2 H2 1.0000 . ? 
C3 C4 1.36(2) . ? 
C3 H3 1.0000 . ? 
C4 C5 1.42(2) . ? 
C4 H4 1.0000 . ? 
C5 H5 1.0000 . ? 
C6 C7B 1.42(3) . ? 
C6 C9A 1.45(3) . ? 
C6 C8B 1.50(3) . ? 
C6 C7A 1.59(3) . ? 
C6 C8A 1.60(3) . ? 
C6 C9B 1.61(3) . ? 
C7A H7A 0.9800 . ? 
C7A H7B 0.9800 . ? 
C7A H7C 0.9800 . ? 
C8A H8A 0.9800 . ? 
C8A H8B 0.9800 . ? 
C8A H8C 0.9800 . ? 
C9A H9A 0.9800 . ? 
C9A H9B 0.9800 . ? 
C9A H9C 0.9800 . ? 
C7B H7D 0.9800 . ? 
C7B H7E 0.9800 . ? 
C7B H7F 0.9800 . ? 
C8B H8D 0.9800 . ? 
C8B H8E 0.9800 . ? 
C8B H8F 0.9800 . ? 
C9B H9D 0.9800 . ? 
C9B H9E 0.9800 . ? 
C9B H9F 0.9800 . ? 
 
loop_ 
 _geom_angle_atom_site_label_1 
 _geom_angle_atom_site_label_2 
 _geom_angle_atom_site_label_3 
 _geom_angle 
 _geom_angle_site_symmetry_1 
 _geom_angle_site_symmetry_3 
 _geom_angle_publ_flag 
C4 Ti1 C4 95.3(11) 2 . ? 
C4 Ti1 C1 130.9(5) 2 . ? 
C4 Ti1 C1 56.8(5) . . ? 
C4 Ti1 C1 56.8(5) 2 2 ? 
C4 Ti1 C1 130.9(5) . 2 ? 
C1 Ti1 C1 170.9(6) . 2 ? 
C4 Ti1 C5 34.9(5) 2 2 ? 
C4 Ti1 C5 130.0(8) . 2 ? 
C1 Ti1 C5 148.7(5) . 2 ? 
C1 Ti1 C5 33.5(5) 2 2 ? 
C4 Ti1 C5 130.0(8) 2 . ? 
C4 Ti1 C5 34.9(5) . . ? 
C1 Ti1 C5 33.5(5) . . ? 
C1 Ti1 C5 148.7(5) 2 . ? 
C5 Ti1 C5 164.8(8) 2 . ? 
C4 Ti1 C2 55.8(5) 2 2 ? 
C4 Ti1 C2 96.8(5) . 2 ? 
C1 Ti1 C2 151.1(5) . 2 ? 
C1 Ti1 C2 34.6(4) 2 2 ? 
C5 Ti1 C2 56.3(5) 2 2 ? 
C5 Ti1 C2 117.9(5) . 2 ? 
C4 Ti1 C2 96.8(5) 2 . ? 
C4 Ti1 C2 55.8(5) . . ? 
C1 Ti1 C2 34.6(4) . . ? 
C1 Ti1 C2 151.1(5) 2 . ? 
C5 Ti1 C2 117.9(5) 2 . ? 
C5 Ti1 C2 56.3(5) . . ? 
C2 Ti1 C2 141.6(7) 2 . ? 
C4 Ti1 C3 33.2(6) 2 2 ? 
C4 Ti1 C3 77.9(6) . 2 ? 
C1 Ti1 C3 132.5(5) . 2 ? 
C1 Ti1 C3 56.5(5) 2 2 ? 
C5 Ti1 C3 56.3(6) 2 2 ? 
C5 Ti1 C3 110.5(7) . 2 ? 
C2 Ti1 C3 33.4(5) 2 2 ? 
C2 Ti1 C3 108.9(6) . 2 ? 
C4 Ti1 C3 77.9(6) 2 . ? 
C4 Ti1 C3 33.2(6) . . ? 
C1 Ti1 C3 56.5(5) . . ? 
C1 Ti1 C3 132.5(5) 2 . ? 
C5 Ti1 C3 110.5(7) 2 . ? 
C5 Ti1 C3 56.3(6) . . ? 
C2 Ti1 C3 108.9(6) 2 . ? 
C2 Ti1 C3 33.4(5) . . ? 
C3 Ti1 C3 78.1(7) 2 . ? 
C4 Ti1 Se1 129.9(4) 2 2 ? 
C4 Ti1 Se1 103.4(6) . 2 ? 
C1 Ti1 Se1 97.6(4) . 2 ? 
C1 Ti1 Se1 76.4(4) 2 2 ? 
C5 Ti1 Se1 108.1(4) 2 2 ? 
C5 Ti1 Se1 82.0(4) . 2 ? 
C2 Ti1 Se1 75.9(4) 2 2 ? 
C2 Ti1 Se1 132.1(3) . 2 ? 
C3 Ti1 Se1 106.9(5) 2 2 ? 
C3 Ti1 Se1 135.7(5) . 2 ? 
C4 Ti1 Se1 103.4(6) 2 . ? 
C4 Ti1 Se1 129.9(4) . . ? 
C1 Ti1 Se1 76.4(4) . . ? 
C1 Ti1 Se1 97.6(4) 2 . ? 
C5 Ti1 Se1 82.0(4) 2 . ? 
C5 Ti1 Se1 108.1(4) . . ? 
C2 Ti1 Se1 132.1(3) 2 . ? 
C2 Ti1 Se1 75.9(4) . . ? 
C3 Ti1 Se1 135.7(5) 2 . ? 
C3 Ti1 Se1 106.9(5) . . ? 
Se1 Ti1 Se1 99.14(11) 2 . ? 
C6 Se1 Ti1 120.5(4) . . ? 
C5 C1 C2 107.7(13) . . ? 
C5 C1 Ti1 73.5(8) . . ? 
C2 C1 Ti1 73.5(7) . . ? 
C5 C1 H1 125.8 . . ? 
C2 C1 H1 125.8 . . ? 
Ti1 C1 H1 125.8 . . ? 
C3 C2 C1 107.9(15) . . ? 
C3 C2 Ti1 73.6(8) . . ? 
C1 C2 Ti1 71.9(7) . . ? 
C3 C2 H2 125.9 . . ? 
C1 C2 H2 125.9 . . ? 
Ti1 C2 H2 125.9 . . ? 
C4 C3 C2 108.7(16) . . ? 
C4 C3 Ti1 71.7(9) . . ? 
C2 C3 Ti1 73.0(7) . . ? 
C4 C3 H3 125.5 . . ? 
C2 C3 H3 125.5 . . ? 
Ti1 C3 H3 125.5 . . ? 
C3 C4 C5 108.4(15) . . ? 
C3 C4 Ti1 75.1(10) . . ? 
C5 C4 Ti1 73.4(8) . . ? 
C3 C4 H4 125.4 . . ? 
C5 C4 H4 125.4 . . ? 
Ti1 C4 H4 125.4 . . ? 
C1 C5 C4 107.3(16) . . ? 
C1 C5 Ti1 72.9(8) . . ? 
C4 C5 Ti1 71.7(9) . . ? 
C1 C5 H5 126.2 . . ? 
C4 C5 H5 126.2 . . ? 
Ti1 C5 H5 126.2 . . ? 
# C7B C6 C9A 134(2) . . ? 
C7B C6 C8B 121.7(19) . . ? 
# C9A C6 C8B 67.5(17) . . ? 
# C7B C6 C7A 30.7(14) . . ? 
C9A C6 C7A 108.6(18) . . ? 
# C8B C6 C7A 137.0(17) . . ? 
# C7B C6 C8A 79.0(17) . . ? 
C9A C6 C8A 107.1(18) . . ? 
# C8B C6 C8A 45.1(14) . . ? 
C7A C6 C8A 104.2(17) . . ? 
C7B C6 C9B 107.5(18) . . ? 
# C9A C6 C9B 40.4(13) . . ? 
C8B C6 C9B 107.8(18) . . ? 
# C7A C6 C9B 76.9(16) . . ? 
# C8A C6 C9B 140.6(17) . . ? 
C7B C6 Se1 100.4(14) . . ? 
C9A C6 Se1 118.5(13) . . ? 
C8B C6 Se1 111.9(13) . . ? 
C7A C6 Se1 107.0(12) . . ? 
C8A C6 Se1 110.4(12) . . ? 
C9B C6 Se1 106.5(11) . . ? 
C6 C7A H7A 109.5 . . ? 
C6 C7A H7B 109.5 . . ? 
H7A C7A H7B 109.5 . . ? 
C6 C7A H7C 109.5 . . ? 
H7A C7A H7C 109.5 . . ? 
H7B C7A H7C 109.5 . . ? 
C6 C8A H8A 109.5 . . ? 
C6 C8A H8B 109.5 . . ? 
H8A C8A H8B 109.5 . . ? 
C6 C8A H8C 109.5 . . ? 
H8A C8A H8C 109.5 . . ? 
H8B C8A H8C 109.5 . . ? 
C6 C9A H9A 109.5 . . ? 
C6 C9A H9B 109.5 . . ? 
H9A C9A H9B 109.5 . . ? 
C6 C9A H9C 109.5 . . ? 
H9A C9A H9C 109.5 . . ? 
H9B C9A H9C 109.5 . . ? 
C6 C7B H7D 109.5 . . ? 
C6 C7B H7E 109.5 . . ? 
H7D C7B H7E 109.5 . . ? 
C6 C7B H7F 109.5 . . ? 
H7D C7B H7F 109.5 . . ? 
H7E C7B H7F 109.5 . . ? 
C6 C8B H8D 109.5 . . ? 
C6 C8B H8E 109.5 . . ? 
H8D C8B H8E 109.5 . . ? 
C6 C8B H8F 109.5 . . ? 
H8D C8B H8F 109.5 . . ? 
H8E C8B H8F 109.5 . . ? 
C6 C9B H9D 109.5 . . ? 
C6 C9B H9E 109.5 . . ? 
H9D C9B H9E 109.5 . . ? 
C6 C9B H9F 109.5 . . ? 
H9D C9B H9F 109.5 . . ? 
H9E C9B H9F 109.5 . . ? 
 
_diffrn_measured_fraction_theta_max    0.919 
_diffrn_reflns_theta_full              28.20 
_diffrn_measured_fraction_theta_full   0.919 
_refine_diff_density_max    0.767 
_refine_diff_density_min   -0.878 
_refine_diff_density_rms    0.193 
 

#===END OF CIF ============================================================== 
# 06sdr011b.cif  [Cp2Zr(SeBu)2]  CCDC-670754

 
data_06sdr011 

_audit_creation_method          'SHELXL-97 + hand edit' 
_audit_creation_date            '2007-07-25'
_audit_author_name              'Webster, M.'
 
_chemical_name_systematic 
; 
 bis(eta5-cyclopentadienyl)bis(t-butylselenolato)zirconium(IV) 
; 
_chemical_name_common             ? 
_chemical_melting_point           ? 
_chemical_formula_moiety         'C18 H28 Se2 Zr' 
_chemical_formula_sum            'C18 H28 Se2 Zr' 
_chemical_formula_weight          493.54 
 
loop_ 
 _atom_type_symbol 
 _atom_type_description 
 _atom_type_scat_dispersion_real 
 _atom_type_scat_dispersion_imag 
 _atom_type_scat_source 
 'C'  'C'   0.0033   0.0016 
 'International Tables Vol C Tables 4.2.6.8 and 6.1.1.4' 
 'H'  'H'   0.0000   0.0000 
 'International Tables Vol C Tables 4.2.6.8 and 6.1.1.4' 
 'Se'  'Se'  -0.0929   2.2259 
 'International Tables Vol C Tables 4.2.6.8 and 6.1.1.4' 
 'Zr'  'Zr'  -2.9673   0.5597 
 'International Tables Vol C Tables 4.2.6.8 and 6.1.1.4' 
 
_symmetry_cell_setting            tetragonal 
_symmetry_space_group_name_H-M    'P 41 21 2' 
_symmetry_Int_Tables_number        92           #  Superceded **
_symmetry_space_group_name_Hall   'P 4abw 2nw'  #  Superceded **

 
 
loop_ 
 _symmetry_equiv_pos_as_xyz 
 'x, y, z' 
 '-x, -y, z+1/2' 
 '-y+1/2, x+1/2, z+1/4' 
 'y+1/2, -x+1/2, z+3/4' 
 '-x+1/2, y+1/2, -z+1/4' 
 'x+1/2, -y+1/2, -z+3/4' 
 'y, x, -z' 
 '-y, -x, -z+1/2' 
 
_cell_length_a                    10.026(2) 
_cell_length_b                    10.026(2) 
_cell_length_c                    19.288(3) 
_cell_angle_alpha                 90.00 
_cell_angle_beta                  90.00 
_cell_angle_gamma                 90.00 
_cell_volume                      1938.7(6) 
_cell_formula_units_Z             4 
_cell_measurement_temperature     120(2)
_cell_measurement_reflns_used     2781 
_cell_measurement_theta_min       2.91
_cell_measurement_theta_max       27.48 
 
_exptl_crystal_description        block
_exptl_crystal_colour             yellow
_exptl_crystal_size_max           1.40 # crystal too large 
_exptl_crystal_size_mid           1.00 
_exptl_crystal_size_min           0.60 
_exptl_crystal_density_meas       ? 
_exptl_crystal_density_diffrn     1.691 
_exptl_crystal_density_method     'not measured' 
_exptl_crystal_F_000              976 
_exptl_absorpt_coefficient_mu     4.315
_exptl_absorpt_correction_type    multi-scan
_exptl_absorpt_correction_T_min   0.2636 # 0.0648 
_exptl_absorpt_correction_T_max   1.0000 # 0.1816 
_exptl_absorpt_process_details 
   'G.M. Sheldrick, (2003). SADABS. Version 2.10. Bruker AXS Inc.'    
 
 
_exptl_special_details 
; 
 ? 
; 
 
_diffrn_ambient_temperature       120(2) 
_diffrn_radiation_wavelength      0.71073 
_diffrn_radiation_type            MoK\a
_diffrn_radiation_source          'Nonius rotating anode' 
_diffrn_radiation_monochromator   graphite 
_diffrn_measurement_device_type   'area detector, Nonius Kappa ccd'
_diffrn_measurement_method        '\f and \w scans'
_diffrn_detector_area_resol_mean  ? 
_diffrn_standards_number          0 
_diffrn_standards_interval_count  ? 
_diffrn_standards_interval_time   ? 
_diffrn_standards_decay_%         0 
_diffrn_reflns_number             15516 
_diffrn_reflns_av_R_equivalents   0.1051 
_diffrn_reflns_av_sigmaI/netI     0.0778 
_diffrn_reflns_limit_h_min        -13 
_diffrn_reflns_limit_h_max        13 
_diffrn_reflns_limit_k_min        -13 
_diffrn_reflns_limit_k_max        12 
_diffrn_reflns_limit_l_min        -22 
_diffrn_reflns_limit_l_max        25 
_diffrn_reflns_theta_min          2.93 
_diffrn_reflns_theta_max          27.65 
_reflns_number_total              2223 
_reflns_number_gt                 1863 
_reflns_threshold_expression      I>2sigma(I) 
 
_computing_data_collection        ? 
_computing_cell_refinement        ? 
_computing_data_reduction         ? 
_computing_structure_solution     'SHELXS-97 (Sheldrick, 1997)' 
_computing_structure_refinement   'SHELXL-97 (Sheldrick, 1997)' 
_computing_molecular_graphics     ? 
_computing_publication_material   ? 
 
_refine_special_details 
; 
 Refinement of F^2^ against ALL reflections.  The weighted R-factor wR and 
 goodness of fit S are based on F^2^, conventional R-factors R are based 
 on F, with F set to zero for negative F^2^. The threshold expression of 
 F^2^ > 2sigma(F^2^) is used only for calculating R-factors(gt) etc. and is 
 not relevant to the choice of reflections for refinement.  R-factors based 
 on F^2^ are statistically about twice as large as those based on F, and R- 
 factors based on ALL data will be even larger. 
; 
 
_refine_ls_structure_factor_coef  Fsqd  
_refine_ls_matrix_type            full 
_refine_ls_weighting_scheme       calc  
_refine_ls_weighting_details 
 'w=1/[\s^2^(Fo^2^)+(0.0611P)^2^+36.6394P] where P=(Fo^2^+2Fc^2^)/3' 
_atom_sites_solution_primary      direct 
_atom_sites_solution_secondary    difmap 
_atom_sites_solution_hydrogens    geom 
_refine_ls_hydrogen_treatment     noref 
_refine_ls_extinction_method      none 
_refine_ls_extinction_coef        ? 
_refine_ls_abs_structure_details 
 'Flack H D (1983), Acta Cryst. A39, 876-881' 
_refine_ls_abs_structure_Flack    0.21(4)
_chemical_absolute_configuration  unk 
 
_refine_ls_number_reflns          2223 
_refine_ls_number_parameters      97 
_refine_ls_number_restraints      10 
_refine_ls_R_factor_all           0.0979 
_refine_ls_R_factor_gt            0.0806 
_refine_ls_wR_factor_ref          0.1859 
_refine_ls_wR_factor_gt           0.1755 
_refine_ls_goodness_of_fit_ref    1.035 
_refine_ls_restrained_S_all       1.036 
_refine_ls_shift/su_max           0.001 
_refine_ls_shift/su_mean          0.000 
 
loop_ 
 _atom_site_label 
 _atom_site_type_symbol 
 _atom_site_fract_x 
 _atom_site_fract_y 
 _atom_site_fract_z 
 _atom_site_U_iso_or_equiv 
 _atom_site_adp_type 
 _atom_site_occupancy 
 _atom_site_symmetry_multiplicity 
 _atom_site_calc_flag 
 _atom_site_refinement_flags 
 _atom_site_disorder_assembly 
 _atom_site_disorder_group 
Zr1 Zr 0.74372(11) 0.74372(11) 1.0000 0.0226(3) Uani 1 2 d S . . 
Se1 Se 0.80195(12) 0.90973(12) 0.89808(6) 0.0280(3) Uani 1 1 d U . . 
C1 C 0.9061(11) 0.5954(12) 0.9347(5) 0.025(2) Uani 1 1 d . . . 
H1 H 0.9989 0.6209 0.9212 0.030 Uiso 1 1 calc R . . 
C2 C 0.8716(11) 0.5289(11) 0.9944(6) 0.026(2) Uani 1 1 d . . . 
H2 H 0.9350 0.4951 1.0303 0.031 Uiso 1 1 calc R . . 
C3 C 0.7338(13) 0.4986(12) 0.9903(6) 0.035(3) Uani 1 1 d . . . 
H3 H 0.6846 0.4382 1.0227 0.042 Uiso 1 1 calc R . . 
C4 C 0.6844(14) 0.5454(14) 0.9258(6) 0.038(3) Uani 1 1 d . . . 
H4 H 0.5951 0.5254 0.9052 0.046 Uiso 1 1 calc R . . 
C5 C 0.7930(12) 0.6082(11) 0.8921(6) 0.028(2) Uani 1 1 d . . . 
H5 H 0.7926 0.6429 0.8435 0.033 Uiso 1 1 calc R . . 
C6 C 0.7894(12) 1.1059(10) 0.9117(6) 0.028(2) Uani 1 1 d U . . 
C7  C 0.8945(14) 1.1467(11) 0.9654(7) 0.039(3) Uani 1 1 d U . . 
H7A H 0.8903 1.2433 0.9729 0.058 Uiso 1 1 calc R . . 
H7B H 0.9834 1.1224 0.9485 0.058 Uiso 1 1 calc R . . 
H7C H 0.8769 1.1005 1.0093 0.058 Uiso 1 1 calc R . . 
C8  C 0.8260(14) 1.1657(13) 0.8418(7) 0.041(3) Uani 1 1 d U . . 
H8A H 0.8222 1.2632 0.8447 0.061 Uiso 1 1 calc R . . 
H8B H 0.7630 1.1345 0.8065 0.061 Uiso 1 1 calc R . . 
H8C H 0.9165 1.1380 0.8291 0.061 Uiso 1 1 calc R . . 
C9  C 0.6504(13) 1.1520(13) 0.9329(7) 0.040(3) Uani 1 1 d U . . 
H9A H 0.6503 1.2490 0.9388 0.060 Uiso 1 1 calc R . . 
H9B H 0.6253 1.1092 0.9767 0.060 Uiso 1 1 calc R . . 
H9C H 0.5862 1.1272 0.8968 0.060 Uiso 1 1 calc R . . 
 
loop_ 
 _atom_site_aniso_label 
 _atom_site_aniso_U_11 
 _atom_site_aniso_U_22 
 _atom_site_aniso_U_33 
 _atom_site_aniso_U_23 
 _atom_site_aniso_U_13 
 _atom_site_aniso_U_12 
Zr1 0.0230(5) 0.0230(5) 0.0218(6) -0.0010(4) 0.0010(4) 0.0000(6) 
Se1 0.0336(7) 0.0247(6) 0.0257(5) 0.0002(4) 0.0042(5) 0.0003(5) 
C1 0.015(5) 0.026(6) 0.033(5) -0.007(5) 0.008(4) 0.007(4) 
C2 0.029(6) 0.015(5) 0.035(6) -0.005(4) -0.001(5) 0.014(4) 
C3 0.042(8) 0.031(6) 0.032(6) -0.003(5) 0.011(5) -0.002(6) 
C4 0.037(7) 0.044(8) 0.033(6) -0.019(5) 0.002(5) 0.000(6) 
C5 0.035(7) 0.025(6) 0.024(5) -0.009(4) 0.004(5) -0.004(5) 
C6 0.033(6) 0.009(4) 0.041(5) 0.001(4) -0.002(4) 0.014(4) 
C7 0.051(7) 0.009(5) 0.055(6) 0.002(4) -0.011(6) -0.005(5) 
C8 0.045(8) 0.029(5) 0.048(5) 0.005(5) 0.003(5) -0.009(6) 
C9 0.040(5) 0.017(5) 0.063(8) 0.014(5) 0.011(5) 0.005(4) 
 
_geom_special_details 
; 
 All esds (except the esd in the dihedral angle between two l.s. planes) 
 are estimated using the full covariance matrix.  The cell esds are taken 
 into account individually in the estimation of esds in distances, angles 
 and torsion angles; correlations between esds in cell parameters are only 
 used when they are defined by crystal symmetry.  An approximate (isotropic) 
 treatment of cell esds is used for estimating esds involving l.s. planes. 
; 
 
loop_ 
 _geom_bond_atom_site_label_1 
 _geom_bond_atom_site_label_2 
 _geom_bond_distance 
 _geom_bond_site_symmetry_2 
 _geom_bond_publ_flag 
Zr1 C3 2.467(13) . ? 
Zr1 C3 2.467(13) 7_557 ? 
Zr1 C2 2.509(10) . ? 
Zr1 C2 2.509(10) 7_557 ? 
Zr1 C4 2.521(12) . ? 
Zr1 C4 2.521(12) 7_557 ? 
Zr1 C5 2.535(10) . ? 
Zr1 C5 2.535(10) 7_557 ? 
Zr1 C1 2.539(10) . ? 
Zr1 C1 2.539(10) 7_557 ? 
Zr1 Se1 2.6411(15) 7_557 ? 
Zr1 Se1 2.6411(15) . ? 
Se1 C6 1.988(10) . ? 
C1 C2 1.374(16) . ? 
C1 C5 1.406(16) . ? 
C1 H1 1.0000 . ? 
C2 C3 1.417(17) . ? 
C2 H2 1.0000 . ? 
C3 C4 1.419(18) . ? 
C3 H3 1.0000 . ? 
C4 C5 1.415(18) . ? 
C4 H4 1.0000 . ? 
C5 H5 1.0000 . ? 
C6 C9 1.524(17) . ? 
C6 C8 1.520(16) . ? 
C6 C7 1.534(17) . ? 
C7 H7A 0.9800 . ? 
C7 H7B 0.9800 . ? 
C7 H7C 0.9800 . ? 
C8 H8A 0.9800 . ? 
C8 H8B 0.9800 . ? 
C8 H8C 0.9800 . ? 
C9 H9A 0.9800 . ? 
C9 H9B 0.9800 . ? 
C9 H9C 0.9800 . ? 
 
loop_ 
 _geom_angle_atom_site_label_1 
 _geom_angle_atom_site_label_2 
 _geom_angle_atom_site_label_3 
 _geom_angle 
 _geom_angle_site_symmetry_1 
 _geom_angle_site_symmetry_3 
 _geom_angle_publ_flag 
C3 Zr1 C3 85.7(6) . 7_557 ? 
C3 Zr1 C2 33.1(4) . . ? 
C3 Zr1 C2 118.5(4) 7_557 . ? 
C3 Zr1 C2 118.5(4) . 7_557 ? 
C3 Zr1 C2 33.1(4) 7_557 7_557 ? 
C2 Zr1 C2 151.6(6) . 7_557 ? 
C3 Zr1 C4 33.0(4) . . ? 
C3 Zr1 C4 77.1(4) 7_557 . ? 
C2 Zr1 C4 54.5(4) . . ? 
C2 Zr1 C4 103.0(4) 7_557 . ? 
C3 Zr1 C4 77.1(4) . 7_557 ? 
C3 Zr1 C4 33.0(4) 7_557 7_557 ? 
C2 Zr1 C4 103.0(4) . 7_557 ? 
C2 Zr1 C4 54.5(4) 7_557 7_557 ? 
C4 Zr1 C4 87.2(6) . 7_557 ? 
C3 Zr1 C5 53.9(4) . . ? 
C3 Zr1 C5 103.6(4) 7_557 . ? 
C2 Zr1 C5 53.5(4) . . ? 
C2 Zr1 C5 118.5(4) 7_557 . ? 
C4 Zr1 C5 32.5(4) . . ? 
C4 Zr1 C5 119.6(4) 7_557 . ? 
C3 Zr1 C5 103.6(4) . 7_557 ? 
C3 Zr1 C5 53.9(4) 7_557 7_557 ? 
C2 Zr1 C5 118.5(4) . 7_557 ? 
C2 Zr1 C5 53.5(4) 7_557 7_557 ? 
C4 Zr1 C5 119.6(4) . 7_557 ? 
C4 Zr1 C5 32.5(4) 7_557 7_557 ? 
C5 Zr1 C5 152.1(6) . 7_557 ? 
C3 Zr1 C1 53.5(4) . . ? 
C3 Zr1 C1 130.7(4) 7_557 . ? 
C2 Zr1 C1 31.6(4) . . ? 
C2 Zr1 C1 150.6(4) 7_557 . ? 
C4 Zr1 C1 53.7(4) . . ? 
C4 Zr1 C1 130.5(4) 7_557 . ? 
C5 Zr1 C1 32.2(4) . . ? 
C5 Zr1 C1 149.9(4) 7_557 . ? 
C3 Zr1 C1 130.7(4) . 7_557 ? 
C3 Zr1 C1 53.5(4) 7_557 7_557 ? 
C2 Zr1 C1 150.6(4) . 7_557 ? 
C2 Zr1 C1 31.6(4) 7_557 7_557 ? 
C4 Zr1 C1 130.5(4) . 7_557 ? 
C4 Zr1 C1 53.7(4) 7_557 7_557 ? 
C5 Zr1 C1 149.9(4) . 7_557 ? 
C5 Zr1 C1 32.2(4) 7_557 7_557 ? 
C1 Zr1 C1 175.5(6) . 7_557 ? 
C3 Zr1 Se1 107.6(3) . 7_557 ? 
C3 Zr1 Se1 125.5(3) 7_557 7_557 ? 
C2 Zr1 Se1 84.2(3) . 7_557 ? 
C2 Zr1 Se1 113.3(3) 7_557 7_557 ? 
C4 Zr1 Se1 138.2(3) . 7_557 ? 
C4 Zr1 Se1 97.3(3) 7_557 7_557 ? 
C5 Zr1 Se1 127.4(3) . 7_557 ? 
C5 Zr1 Se1 71.5(3) 7_557 7_557 ? 
C1 Zr1 Se1 95.4(2) . 7_557 ? 
C1 Zr1 Se1 81.8(3) 7_557 7_557 ? 
C3 Zr1 Se1 125.5(3) . . ? 
C3 Zr1 Se1 107.6(3) 7_557 . ? 
C2 Zr1 Se1 113.3(3) . . ? 
C2 Zr1 Se1 84.2(3) 7_557 . ? 
C4 Zr1 Se1 97.3(3) . . ? 
C4 Zr1 Se1 138.2(3) 7_557 . ? 
C5 Zr1 Se1 71.5(3) . . ? 
C5 Zr1 Se1 127.4(3) 7_557 . ? 
C1 Zr1 Se1 81.8(3) . . ? 
C1 Zr1 Se1 95.4(2) 7_557 . ? 
Se1 Zr1 Se1 105.99(7) 7_557 . ? 
C6 Se1 Zr1 120.7(3) . . ? 
C2 C1 C5 109.4(10) . . ? 
C2 C1 Zr1 73.0(6) . . ? 
C5 C1 Zr1 73.7(6) . . ? 
C2 C1 H1 125.1 . . ? 
C5 C1 H1 125.1 . . ? 
Zr1 C1 H1 125.1 . . ? 
C1 C2 C3 107.6(10) . . ? 
C1 C2 Zr1 75.4(6) . . ? 
C3 C2 Zr1 71.8(6) . . ? 
C1 C2 H2 125.9 . . ? 
C3 C2 H2 125.9 . . ? 
Zr1 C2 H2 125.9 . . ? 
C4 C3 C2 108.5(11) . . ? 
C4 C3 Zr1 75.6(7) . . ? 
C2 C3 Zr1 75.1(7) . . ? 
C4 C3 H3 125.2 . . ? 
C2 C3 H3 125.2 . . ? 
Zr1 C3 H3 125.2 . . ? 
C3 C4 C5 106.4(12) . . ? 
C3 C4 Zr1 71.4(7) . . ? 
C5 C4 Zr1 74.3(7) . . ? 
C3 C4 H4 126.5 . . ? 
C5 C4 H4 126.5 . . ? 
Zr1 C4 H4 126.5 . . ? 
C1 C5 C4 108.1(10) . . ? 
C1 C5 Zr1 74.1(6) . . ? 
C4 C5 Zr1 73.2(6) . . ? 
C1 C5 H5 125.6 . . ? 
C4 C5 H5 125.6 . . ? 
Zr1 C5 H5 125.6 . . ? 
C9 C6 C8 109.8(9) . . ? 
C9 C6 C7 111.4(10) . . ? 
C8 C6 C7 109.2(11) . . ? 
C9 C6 Se1 113.1(8) . . ? 
C8 C6 Se1 105.0(8) . . ? 
C7 C6 Se1 108.1(7) . . ? 
C6 C7 H7A 109.5 . . ? 
C6 C7 H7B 109.5 . . ? 
H7A C7 H7B 109.5 . . ? 
C6 C7 H7C 109.5 . . ? 
H7A C7 H7C 109.5 . . ? 
H7B C7 H7C 109.5 . . ? 
C6 C8 H8A 109.5 . . ? 
C6 C8 H8B 109.5 . . ? 
H8A C8 H8B 109.5 . . ? 
C6 C8 H8C 109.5 . . ? 
H8A C8 H8C 109.5 . . ? 
H8B C8 H8C 109.5 . . ? 
C6 C9 H9A 109.5 . . ? 
C6 C9 H9B 109.5 . . ? 
H9A C9 H9B 109.5 . . ? 
C6 C9 H9C 109.5 . . ? 
H9A C9 H9C 109.5 . . ? 
H9B C9 H9C 109.5 . . ? 
 
_diffrn_measured_fraction_theta_max    0.985 
_diffrn_reflns_theta_full              27.65 
_diffrn_measured_fraction_theta_full   0.985 
_refine_diff_density_max    1.829 
_refine_diff_density_min   -1.015 
_refine_diff_density_rms    0.216 
 

#===END OF CIF ==============================================================
#
# The following lines are used to test the character set of files sent by
# network email or other means. They are not part of the CIF data set.
# abcdefghijklmnopqrstuvwxyzABCDEFGHIJKLMNOPQRSTUVWXYZ0123456789
# !@#$%^&*()_+{}:"~<>?|\-=[];'`,./                 
#
#===END OF FILE =============================================================
